# Supplementary material for: Pathway dynamics can delineate the sources of transcriptional noise in gene expression
Source: eLife. 2021 Oct 12;10:e69324. doi: 10.7554/eLife.69324 (PMC8608387; doi:10.7554/eLife.69324)
Supplement: Table 2—source data 1. [file elife-69324-table2-data1.xlsx]

## Sheet: Row 1 
N1	N2	M1	M2	PathNM1	PathNM2	DR:NN	DR:MM
9.45	9.536	49.872	49.572	0.00242289	-0.000683786	2.21637	0.000175582
9.726	9.876	49.748	49.704	-0.00115359	0.00854733	1.71499	0.000252624
10.488	10.43	49.446	49.544	0.00218403	0.0195732	1.57577	0.00171764
10.104	10.434	50.172	49.942	0.00131267	0.0104089	3.52561	-0.000856577
9.19	9.06	50.412	49.824	-0.00747098	-0.00638718	1.61284	-0.00101866
10.694	10.832	50.122	49.826	0.0194816	-0.0239294	3.63519	0.000983487
11.374	11.318	50.104	49.682	0.0233939	0.0112035	6.83596	0.000240339
9.948	10.128	49.586	50.23	0.0107912	0.00381823	7.95407	-0.000708357
9.908	9.81	49.752	50.198	-0.00953095	-0.000997808	1.51144	0.00182354
9.122	9.454	49.766	50.138	-0.0113307	0.00725357	2.38299	0.0011157
12.716	12.762	49.648	50.15	-0.00610729	-0.00165687	17.0411	-0.000392456
9.77	9.584	49.448	50.13	-0.000761106	0.0198173	2.10949	0.00115679
10.358	9.928	50.338	50.09	0.00446422	-0.00355334	2.1165	0.00130488
10.512	10.694	49.804	49.868	-0.00854299	0.0232565	1.77461	0.000267132
11.534	11.658	50.222	50.352	0.0155499	-0.0440156	12.2134	0.00215232
9.21	9.112	49.576	49.932	-0.0182561	1.23681e-05	2.02533	-0.000285302
9.81	9.886	49.66	50.132	0.00646537	-0.0232362	3.01125	-0.000320022
10.214	10.31	49.804	49.552	0.00848948	-0.00517225	1.54034	-0.000842001
9.126	8.998	49.79	50.466	-0.00842724	-0.00438026	1.50309	1.66927e-05
9.132	9.258	49.656	49.67	-0.0167906	0.00355426	1.82514	-0.00110646
11.398	11.544	50.094	50.248	0.00360913	-0.0246793	4.03771	-0.000514835
10.37	10.104	49.666	50.088	-0.0123548	0.0144747	2.12332	0.000308291
10.264	10.484	50.294	49.508	-0.00910278	0.0139654	3.20872	0.000655398
9.632	9.668	50.19	49.464	0.00158752	-0.0109834	1.34585	1.12365e-05
10.414	10.446	49.998	50.012	-0.0174567	0.00780744	2.34861	2.64572e-05
10.58	10.372	50.212	50.58	-0.0185238	0.00560051	3.18819	0.000413881
9.672	9.6	49.83	49.678	0.00788421	-0.0040903	1.28707	-0.000745896
8.856	9.028	50.01	49.962	0.0121887	-0.00476489	1.26374	0.00146229
9.514	9.212	49.804	49.678	-0.00803839	-0.00201379	1.61069	0.00256879
10.536	11.134	50.058	49.78	0.00119864	-0.00397822	4.1356	0.000786022
8.94	9.27	49.736	49.674	0.0023981	0.000635438	1.33274	0.000480173
9.498	9.516	49.774	49.674	0.000539516	-0.00426025	2.49576	0.00179302
9.042	9.248	49.722	50.504	-0.013333	0.00614212	1.43972	-0.000556988
10.456	10.446	49.982	50.282	0.00300673	0.00402947	2.95407	-0.000190148
10.222	10.146	50.038	50.516	0.0103975	-0.00487055	4.87296	0.000226107
9.974	10.286	50.038	50.02	-0.00509357	-0.00271428	1.36184	-0.000914674
10.378	10.666	50.204	49.744	-0.0145605	-0.00962686	2.35276	-0.00161926
10.568	10.552	50.274	50.204	0.00391218	-0.0164682	2.6761	8.34107e-05
8.73	9.042	49.79	49.696	-0.00322893	0.0137958	1.1041	0.000112642
10.036	10.064	50.11	50.086	0.00783035	-0.00488116	4.21885	-0.000139517
11.33	11.464	50.104	50.176	-0.00316714	-0.0322953	11.2312	-0.000544563
11.002	10.752	49.49	49.504	-0.00205922	-0.00752822	4.12176	0.00255497
9.862	9.634	49.76	50.092	0.00654797	-0.0029366	2.20355	0.00222467
9.634	9.454	49.944	50.192	-0.003308	-0.00383298	2.18549	0.000826913
10.252	10.04	49.876	50.092	-0.0198915	0.00151483	3.39454	0.000787445
9.636	10.032	50.282	50.548	0.00242923	-0.00507335	2.2197	-5.73057e-06
9.642	9.816	50.01	50.472	0.0113325	-0.00449224	1.54793	0.000767462
9.512	9.414	49.988	50.032	-0.00303003	0.000282415	2.02505	0.00134951
9.956	10.094	49.768	50.32	-0.0223543	0.0016806	2.2123	-0.00113061
8.772	8.98	50.346	49.642	-0.00202634	-0.0153591	1.45918	0.000922058
10.516	10.626	49.988	50.046	-0.00914526	-0.00587271	2.85922	-0.00172446
10.852	11.03	50.064	50.074	-0.000642794	0.00357717	2.54031	0.000197956
9.468	9.656	49.86	49.406	-0.004573	0.00719091	3.54564	0.000453472
9.046	8.982	49.902	50.608	-0.000709177	-0.0154415	2.54912	-9.53884e-05
9.424	9.406	50.112	50.22	-0.00913938	0.0017154	1.81152	0.000104062
10.154	10.188	50.146	49.93	-0.00650672	-0.0102721	6.86793	0.000320244
9.92	9.89	49.84	49.94	0.0012468	0.00572386	2.38679	-1.99675e-05
8.304	8.446	49.814	50.092	-0.00588975	0.00555376	0.888665	0.000105655
10.082	9.814	49.938	49.874	0.0145145	-0.00435108	3.12931	-0.000152803
9.454	9.546	50.048	50.396	-0.00719978	0.00354035	2.36201	0.00180639
10.208	10.176	50.124	50.166	-0.00200883	-0.00428528	3.00472	-0.000352495
10.588	10.774	50.042	50.1	-0.00455137	-0.0146268	6.55474	0.000632991
11.302	11.204	49.838	50.104	0.0212454	-0.020736	6.5798	0.000153625
10.142	10.05	49.72	50.112	-0.00298904	0.00495883	2.5548	0.000946422
10.53	10.734	49.818	49.83	0.00625071	0.00687662	2.56517	-0.000739845
8.888	9.358	50.138	50.114	0.00571004	-0.00464247	1.39313	-0.000155421
10.414	10.182	49.582	49.894	0.0112379	-0.0182576	2.71213	-0.000589862
10.276	10.076	49.816	49.746	-0.00511507	-0.00830943	2.01209	-0.000415955
9.318	9.548	49.596	49.956	-0.0145823	-0.00670108	1.79711	0.000671432
8.518	8.596	50.21	50.058	-0.00915762	-0.00635381	1.07095	0.00142076
10.746	10.74	49.854	50.132	-0.00483501	-0.0361701	8.77627	-0.00140029
11.398	11.396	49.41	49.922	-0.0114886	-0.00987914	14.3471	-0.000638588
9.866	10.022	49.76	49.856	-0.012769	0.00956402	3.31426	-0.000791866
9.91	9.984	50.61	50.294	-0.00293502	-0.0193269	3.0624	0.000431707
9.558	9.306	50.182	49.92	-0.0102564	0.00902554	1.84999	0.00133618
9.782	9.834	50.958	50.362	0.0189414	0.0124185	1.51488	-0.00227736
10.812	11.004	49.44	50.358	-0.00719672	-0.0296971	4.10423	-0.000727454
10.338	10.16	50.65	50.078	0.0155429	0.0101374	1.72319	-0.00130786
9.358	9.17	49.878	50.47	-0.00784485	-0.0170257	1.97187	-0.000743802
10.294	10.346	50.398	50.142	0.0150939	0.0148974	5.54812	-0.00175199
9.246	9.282	50.076	49.95	0.00688047	0.00246829	1.25176	-0.00085655
8.568	8.444	49.97	49.938	0.00791749	-0.00938726	1.7026	-0.00152821
10.456	10.256	50.458	50.196	0.00525541	0.00278684	3.88696	-0.00134578
9.534	9.082	49.894	49.994	-0.00438009	0.00626409	1.36658	-0.000521664
9.628	9.934	49.732	49.608	-0.000112367	0.0093736	1.36745	0.000114916
9.648	9.814	50.002	50.264	0.01037	0.0198599	1.82408	0.00107383
10.398	10.142	49.898	49.862	-0.00870102	-0.00641267	2.90853	-0.00133227
11.49	11.116	49.664	50.08	-0.0287049	0.0187422	3.6454	-0.0012848
8.976	9.09	49.74	49.414	0.00276893	-0.0141058	1.34697	-0.000531754
10.222	10.028	50.02	50.36	0.00220576	0.00298	2.13835	0.000113287
9.398	9.626	49.832	50.16	0.0104344	-0.000465183	1.94549	-0.000438199
9.918	10.09	49.842	50.334	0.0167166	0.0056741	2.66954	-0.000844032
10.218	10.076	50.318	50.142	-0.0159403	0.028129	5.90242	0.00120447
10.76	10.702	50.044	49.872	0.00341007	-0.00212544	2.8375	0.00134079
9.256	9.272	49.692	49.608	0.000511619	0.0127147	1.7944	0.00144024
9.98	10.316	49.836	50.366	0.00410727	0.0119728	3.68555	-0.000704176
10.256	10.264	49.796	49.564	0.00724803	-0.00851454	3.03854	-0.000553333
10.332	10.582	49.942	49.662	-0.000910238	0.00930977	7.88973	0.000672413
9.54	9.5	49.228	50.008	-0.00477307	0.00536988	2.89505	0.00133999
9.298	9.08	50.15	49.858	0.00770862	-0.0190893	1.52346	-0.000562921
				-0.000842224	-0.00162712	3.21102	9.16716e-05
				0.0101699	0.0128182	2.71874	0.00102106

## Sheet: Row 2
N1	N2	M1	M2	NM1	NM2	DR:NN	DR:MM
4.774	4.894	49.392	49.17	0.0986232	0.104998	0.0928946	0.101276
4.972	5.088	50.526	50.586	0.107919	0.1001	0.0969806	0.107483
4.968	5.148	50.06	50.1	0.105471	0.0862599	0.0861435	0.0951214
5.054	5.206	51.438	51.126	0.0774582	0.0958178	0.0803121	0.0951088
5.05	5.182	50.45	51.17	0.103104	0.111464	0.126543	0.097653
5.032	4.9	49.696	49.572	0.0842478	0.0832829	0.0770985	0.0853004
4.936	5.134	50.09	49.74	0.101016	0.0912005	0.0841642	0.105263
4.93	5.054	50.158	50.466	0.114128	0.0871077	0.0982764	0.103074
5.144	4.856	49.614	49.91	0.10503	0.102138	0.0889209	0.109717
5.088	5.12	50.482	49.952	0.0985087	0.0909478	0.0856758	0.09374
4.958	4.916	48.784	48.582	0.0925605	0.0995458	0.10814	0.104443
5.128	4.91	49.152	48.732	0.106264	0.115554	0.104247	0.112523
5.23	5.02	50.164	50.34	0.0877287	0.0899329	0.0937864	0.103891
4.926	4.996	48.986	49.542	0.110102	0.108584	0.111058	0.113126
4.896	5.078	49.578	49.448	0.10377	0.104859	0.114303	0.0957885
5.016	4.974	50.188	50.546	0.111523	0.0822126	0.103552	0.1007
4.992	5.052	50.464	50.83	0.108593	0.100464	0.101808	0.0973583
4.874	5.126	49.492	49.446	0.0934944	0.104351	0.0934411	0.108114
5.172	5.082	51.04	51.504	0.0950656	0.0901182	0.0890492	0.0925875
5.238	5.032	49.826	49.966	0.107774	0.106769	0.116419	0.102517
5.11	5.234	50.798	50.12	0.100966	0.0849795	0.0849033	0.0927403
4.968	5.092	49.626	49.816	0.109799	0.101917	0.108092	0.103509
5.064	5.096	49.81	49.45	0.100273	0.0941608	0.109101	0.0914976
4.964	4.746	49.16	49.476	0.116751	0.119342	0.127205	0.113405
4.884	4.71	47.694	48.556	0.112222	0.10089	0.120498	0.106643
5.006	4.836	50.496	50.502	0.102621	0.0901715	0.0929192	0.0999631
5.124	5.08	50.012	50.214	0.0894882	0.105166	0.0839977	0.0976784
4.878	4.858	48.538	48.948	0.115854	0.094898	0.106075	0.108382
5.184	5.168	51.282	51.724	0.0989849	0.0917116	0.0868108	0.104216
5.084	5.182	49.952	50.502	0.0935578	0.0986019	0.0935135	0.096003
5.18	5.3	51.098	51.386	0.106756	0.0995588	0.0921198	0.10277
5.004	4.996	49.644	50.232	0.0951245	0.103383	0.121844	0.103091
5.12	5.014	50.224	50.296	0.0850988	0.105538	0.11297	0.0986705
5.034	5.15	49.568	50.378	0.108176	0.112168	0.100061	0.113227
5.118	5.144	50.494	50.504	0.0903787	0.0907207	0.0839986	0.0990256
4.948	5.312	50.028	50.204	0.10568	0.103356	0.115444	0.102842
4.97	5.178	49.932	49.414	0.0997472	0.107546	0.0915517	0.106385
5.024	5.182	50.032	50.208	0.100309	0.102582	0.105057	0.102336
4.904	4.93	49.21	49.18	0.108669	0.101766	0.105655	0.102431
4.972	5.062	49.552	50.116	0.0886915	0.100635	0.0911594	0.0945762
5.162	5.056	50.578	50.452	0.0994405	0.0996668	0.107611	0.105623
5.292	5.174	51.596	51.016	0.105754	0.0913082	0.0952641	0.102448
5.164	4.964	50	49.63	0.0823801	0.0922871	0.0672288	0.0954672
4.94	5.144	50.232	50.07	0.120258	0.0995231	0.113745	0.102657
4.95	5.038	49.6	50.018	0.0848308	0.0983325	0.0956235	0.0947608
4.844	4.956	49.43	50.172	0.11815	0.106601	0.127432	0.106345
5.132	5.012	50.158	50.702	0.101625	0.0975496	0.105664	0.107606
5.266	5.104	51.234	51.508	0.099346	0.114133	0.110511	0.102193
4.964	4.912	49.282	49.524	0.090733	0.0985113	0.107454	0.0902454
5.074	4.982	50.096	50.254	0.0926798	0.0846241	0.066011	0.0941368
5.09	4.958	50.356	49.86	0.0990697	0.0884439	0.115533	0.0923651
5.074	5.218	50.574	50.49	0.106738	0.0926832	0.0871912	0.0976327
5.02	5.064	49.796	49.028	0.0892755	0.100307	0.0977799	0.103286
5.266	5.226	49.962	50.098	0.10305	0.0997589	0.0962635	0.104351
5.306	5.182	51.062	50.686	0.0883049	0.100306	0.0983323	0.0992002
5.02	5.054	49.558	49.064	0.117466	0.10411	0.103037	0.111354
5.012	5.044	49.076	50.286	0.105758	0.111282	0.105726	0.119091
5.114	4.944	50.746	50.478	0.0915727	0.0880286	0.0725392	0.094702
4.762	4.924	49.328	49.818	0.105678	0.10676	0.118794	0.0971804
4.83	4.928	49.116	49.37	0.114742	0.109636	0.115083	0.115637
5.032	4.888	49.698	49.382	0.0970016	0.110416	0.120404	0.104407
4.996	5.054	49.384	49.298	0.103463	0.104136	0.103662	0.110865
4.912	4.748	50.088	49.808	0.120582	0.111805	0.122009	0.109756
5.13	4.986	50.308	50.162	0.0895621	0.108011	0.0861761	0.0996934
4.876	4.98	49.092	48.924	0.130851	0.119177	0.137886	0.114784
5.11	5.014	49.87	50.83	0.111016	0.103016	0.119532	0.1097
5.096	4.978	50.934	51.086	0.0913306	0.0940194	0.087139	0.0955155
5.144	5.228	51.186	51.006	0.097891	0.105539	0.097588	0.113058
5.226	5.154	51.57	51.078	0.0868481	0.0927417	0.0995202	0.089102
5.108	4.978	49.82	50.324	0.106813	0.0883763	0.104914	0.0966667
4.966	5.204	50.008	50.478	0.086338	0.099139	0.0995269	0.0993413
4.874	5.024	49.302	49.878	0.0927541	0.102896	0.103815	0.102216
5.148	5.146	50.182	50.44	0.111027	0.10351	0.101155	0.105168
5.094	5.02	48.53	49.732	0.106625	0.0970774	0.0996883	0.096142
4.91	5.09	50.412	50.334	0.0915973	0.0918618	0.0920579	0.091645
4.944	5.072	50.556	50.258	0.092288	0.0965076	0.109888	0.102763
5.102	4.912	50.212	49.906	0.0935207	0.10069	0.103914	0.0976197
4.946	4.994	50.124	49.766	0.0904249	0.111818	0.107163	0.0915825
5.066	5.05	50.426	50.134	0.102044	0.099914	0.104445	0.100367
4.982	5.102	50.688	49.808	0.114031	0.111791	0.10438	0.114477
5.062	4.99	49.166	48.812	0.106811	0.0993486	0.117682	0.107422
5.206	5.044	50.936	50.52	0.10122	0.110585	0.106116	0.0947095
5.016	4.938	49.732	49.862	0.10283	0.0805427	0.0975341	0.0976722
4.922	5.01	49.544	49.024	0.112137	0.113805	0.126972	0.115432
5.06	5.04	49.38	50.066	0.10638	0.112106	0.131765	0.103558
5.096	5.216	51.032	51.128	0.104974	0.106467	0.101678	0.0990443
5.092	5.08	49.916	49.47	0.0920262	0.0985164	0.0771099	0.0985428
4.902	4.886	49.476	49.326	0.103644	0.104493	0.104037	0.103275
4.974	5.098	49.662	49.104	0.116894	0.103877	0.110111	0.116433
4.856	4.89	50.046	49.742	0.0997316	0.0873881	0.0735984	0.0929009
5.166	5.232	50.082	49.944	0.106606	0.100102	0.117722	0.0995318
5.022	4.982	49.122	49.468	0.11047	0.0999624	0.0923683	0.109756
5.136	5.026	49.748	49.944	0.0961678	0.0990572	0.103426	0.100384
4.866	4.874	48.64	49.11	0.101172	0.110924	0.112766	0.103104
4.922	4.858	49.862	49.74	0.114699	0.0924766	0.10958	0.101117
4.88	4.71	48.198	48.65	0.112219	0.102808	0.114705	0.10435
5.072	4.908	50.136	49.744	0.0931046	0.0844901	0.0698218	0.0881241
4.958	4.834	48.28	47.972	0.10289	0.103604	0.1008	0.103169
5.06	5.216	50.1	50.214	0.0940794	0.0899559	0.101178	0.0946459
5.162	5.272	49.428	49.694	0.0972076	0.100761	0.11804	0.0975878
				0.101497	0.100024	0.101845	0.101761
				0.00988128	0.00858626	0.0144646	0.00704477

## Sheet: Row 3
N1	N2	M1	M2	NM1	NM2	DR:NN	DR:MM
4.93	5.104	50.088	49.65	0.190286	0.189059	0.185856	0.190381
4.752	4.78	48.558	48.804	0.206284	0.222419	0.22601	0.211081
4.936	4.84	49.006	48.614	0.198038	0.196389	0.205925	0.19049
5.18	5.122	51.916	52.136	0.200215	0.203355	0.200388	0.209233
4.732	5	48.016	47.882	0.184869	0.20107	0.200316	0.199274
5.014	5.074	50.004	49.924	0.225762	0.214319	0.217839	0.204349
5.302	5.23	51.278	51.45	0.20933	0.207371	0.208518	0.207878
5.124	5.018	51.268	50.25	0.199719	0.198234	0.194529	0.205241
5.234	5.206	51.518	51.124	0.185335	0.195831	0.177607	0.195449
5.194	5.056	51.632	50.676	0.176481	0.185042	0.187846	0.181235
4.792	4.66	47.536	47.674	0.201531	0.199431	0.209516	0.202585
5.086	5.174	50.736	50.176	0.20089	0.195241	0.192787	0.206751
5.022	5.048	49.166	49.512	0.198169	0.179378	0.183987	0.201031
5.014	4.984	49.7	50.354	0.198797	0.195597	0.192793	0.209965
5.084	5.106	49.884	50.878	0.229747	0.197108	0.203308	0.21747
4.902	4.802	49.112	49.566	0.210496	0.189821	0.197877	0.201876
4.928	4.898	47.99	48.258	0.205495	0.211596	0.214813	0.19531
4.916	5.176	49.988	49.318	0.189109	0.199796	0.205352	0.190816
4.858	5.078	49.046	48.468	0.214571	0.199161	0.202403	0.198848
4.882	5.13	48.55	48.748	0.189209	0.199372	0.189055	0.199616
4.912	4.86	48.716	48.552	0.212261	0.205304	0.224377	0.207633
4.808	4.892	49.206	48.994	0.204014	0.191846	0.181022	0.19879
5.234	5.134	50.718	50.348	0.183333	0.185019	0.180801	0.188186
5.09	5.21	51.118	50.586	0.21544	0.199132	0.191231	0.209915
5.03	4.998	49.044	49.23	0.19392	0.206852	0.192034	0.204921
5.016	4.92	50.348	48.782	0.254405	0.263104	0.257874	0.258419
4.988	5.036	49.22	49.178	0.173581	0.18428	0.172339	0.167207
4.882	4.88	48.624	48.926	0.194741	0.194053	0.18118	0.194886
5.076	5.076	50.362	49.964	0.211348	0.212804	0.21592	0.212303
5.074	5.034	50.442	50.752	0.20608	0.214423	0.20601	0.219975
4.944	4.902	48.754	48.628	0.186476	0.182522	0.17987	0.179105
5.014	5.1	49.614	50.04	0.176469	0.158755	0.173219	0.1731
4.864	5.306	50.942	50.992	0.198451	0.222124	0.222218	0.207587
5.082	5.194	49.972	49.906	0.195709	0.202882	0.191704	0.195062
5.162	5.124	50.022	50.222	0.229915	0.213589	0.219338	0.214635
5.03	5.01	48.818	48.43	0.201113	0.203881	0.209691	0.202535
5.148	4.992	50.324	50.54	0.194802	0.21035	0.2258	0.189972
5.082	4.96	49.408	49.04	0.181367	0.171548	0.184577	0.182143
4.856	5.11	50.258	49.814	0.229086	0.206032	0.219986	0.201352
4.808	4.92	48.254	48.246	0.214419	0.207837	0.19674	0.217408
5.26	5.182	52.528	52.364	0.17251	0.194351	0.182139	0.19048
4.926	4.988	48.456	48.908	0.193688	0.164528	0.173198	0.183219
5.026	4.766	48.846	48.832	0.203739	0.190809	0.189998	0.199037
4.954	4.868	48.578	48.816	0.177982	0.179101	0.175584	0.189062
5.16	5.112	51.372	51.658	0.201303	0.186283	0.19305	0.197318
5.038	5.06	50.29	51.172	0.193522	0.204478	0.215859	0.19468
4.962	4.968	49.12	49.76	0.185888	0.173936	0.188147	0.176855
5.1	5.168	49.996	49.856	0.187301	0.179832	0.165951	0.190421
5.208	5.188	51.36	51.92	0.201219	0.204273	0.206893	0.198702
5.104	4.92	50.384	50.71	0.212418	0.231422	0.228491	0.214306
4.802	5.02	48.446	48.522	0.208794	0.212731	0.203674	0.208347
5.018	4.974	48.934	49.262	0.202013	0.203169	0.191511	0.201317
5.158	5.004	50.692	50.68	0.18473	0.195204	0.180029	0.19278
4.942	5.042	48.98	49.258	0.19586	0.193911	0.206952	0.192317
4.948	5.026	49.446	49.59	0.215724	0.187322	0.185881	0.20334
5.184	5.078	50.722	50.618	0.195662	0.184177	0.197233	0.187658
5.044	4.854	49.784	49.356	0.223119	0.215805	0.218805	0.225616
5.094	5.13	50.684	50.396	0.201662	0.197061	0.200069	0.206271
4.934	4.838	49.328	48.218	0.211413	0.214522	0.212455	0.209613
5.184	5.102	51.792	51.738	0.182391	0.182071	0.157874	0.193835
4.892	5.058	50.498	50.058	0.227222	0.208862	0.208318	0.220585
5	5.256	51.252	50.742	0.207619	0.21171	0.175236	0.219056
4.97	5.04	49.746	50.346	0.201604	0.204442	0.193578	0.204733
5.084	4.922	49.972	50.056	0.207866	0.195477	0.197752	0.20305
4.722	4.802	48.144	48.824	0.221085	0.210994	0.207911	0.217602
5.208	5.064	50.576	51.004	0.192854	0.182551	0.188396	0.183551
5.14	5.11	51.94	51.98	0.186514	0.183978	0.170397	0.196362
4.866	4.896	49.778	50.27	0.182606	0.172805	0.159573	0.181613
4.938	4.902	50.742	50.844	0.210739	0.209114	0.205894	0.213669
5.104	5.002	49.01	49.362	0.213441	0.197631	0.2208	0.195327
4.936	5.118	49.95	50.01	0.177578	0.192808	0.17133	0.200902
4.906	4.896	50.076	50.656	0.171029	0.174155	0.164036	0.183462
5.15	5.314	51.114	51.392	0.211026	0.201228	0.198331	0.206832
5.162	5.148	51.452	51.926	0.24448	0.239969	0.272014	0.231091
5.104	4.738	48.646	49.238	0.213682	0.187191	0.199187	0.210453
4.908	4.884	47.938	47.766	0.206748	0.177452	0.171859	0.195069
4.982	5.072	48.768	49.414	0.17727	0.180421	0.184918	0.186406
5.1	5.276	50.604	50.802	0.171598	0.19614	0.17742	0.190356
5.122	5.138	50.704	51.064	0.1817	0.207786	0.174655	0.200859
4.952	5.202	49.502	48.91	0.206799	0.203757	0.187084	0.211512
5.078	4.962	50.872	50.708	0.222023	0.198371	0.200304	0.224492
4.956	4.902	49.906	49.12	0.198169	0.199055	0.191691	0.211668
5.042	5.04	50.228	50.112	0.191991	0.188597	0.195038	0.196509
5.028	5.162	49.654	49.834	0.17847	0.195494	0.173012	0.195333
5.054	5.1	49.44	49.186	0.215279	0.225277	0.21772	0.22124
4.992	4.968	51.016	50.482	0.178839	0.200219	0.187136	0.203885
5.02	4.964	49.138	49.58	0.204726	0.191061	0.19545	0.188483
5.158	5.202	51.198	51.116	0.23063	0.221712	0.228846	0.232665
5.064	5.092	49.532	50.142	0.178485	0.180795	0.169817	0.202603
5.15	5.106	50.102	50.316	0.171212	0.167256	0.151585	0.179809
5.044	5.248	52.828	51.782	0.176984	0.212914	0.196801	0.208003
4.826	4.952	48.506	48.76	0.18524	0.196602	0.187738	0.203668
5.116	4.958	50.996	50.858	0.167622	0.171357	0.157257	0.180999
5.176	5.096	50.27	49.754	0.197593	0.183425	0.16886	0.205695
5.174	5.018	50.466	49.794	0.190096	0.198823	0.179956	0.209405
5.012	4.972	49.776	49.672	0.174966	0.166787	0.16825	0.18271
4.99	5.182	50.336	49.758	0.209648	0.199619	0.206995	0.202449
4.836	4.74	48.174	48.038	0.163716	0.177394	0.14737	0.182387
4.988	5.174	50.72	50.056	0.195356	0.186652	0.199955	0.193167
5.08	4.816	50.33	49.468	0.209267	0.212087	0.233398	0.197631
				0.19876	0.197229	0.194823	0.200745
				0.0173515	0.01639	0.0211544	0.0139851

## Sheet: Row 4
N1	N2	M1	M2	NM1	NM2	DR:NN	DR:MM
4.852	4.866	47.994	47.95	0.568023	0.561025	0.558349	0.557969
5.208	5.058	49.876	50.006	0.463602	0.439005	0.450065	0.461595
4.818	4.97	48.624	49.01	0.490756	0.529841	0.501245	0.510702
5.306	5.226	51.86	50.964	0.481572	0.506883	0.495808	0.498379
4.832	4.844	48.988	49.224	0.481602	0.516334	0.52432	0.495997
4.87	5.176	48.834	48.96	0.444888	0.443411	0.435227	0.4514
4.836	4.832	46.71	47.206	0.48355	0.468745	0.457293	0.496681
5.274	5.008	49.924	50.504	0.469276	0.4867	0.486347	0.465223
4.798	4.908	47.398	47.406	0.484024	0.522298	0.477392	0.52161
5.26	5.256	53.132	52.68	0.48383	0.463688	0.448672	0.474504
4.862	5.154	50.128	49.654	0.45134	0.471922	0.445016	0.467672
4.946	4.996	48.928	48.324	0.494026	0.488999	0.475077	0.499962
5.314	4.95	50.338	50.482	0.435621	0.428813	0.410095	0.448134
5.178	5.32	50.396	51.182	0.500212	0.514823	0.481853	0.530209
5.338	5.158	51.258	51.31	0.475137	0.516042	0.500853	0.491884
5.686	5.692	55	55.144	0.475315	0.453202	0.440845	0.482611
4.862	4.766	47.878	47.602	0.535239	0.53922	0.53376	0.534938
4.732	4.842	46.716	46.184	0.518969	0.515222	0.506315	0.535322
5.01	5.324	50.814	50.502	0.488512	0.494685	0.504313	0.491565
5.15	5.114	49.986	50.098	0.524598	0.519752	0.522929	0.537688
5.218	5.212	52.34	52.72	0.459187	0.485158	0.4892	0.46592
4.948	4.834	48.856	49.178	0.48062	0.502807	0.498826	0.500702
5.038	5.026	50.396	50.32	0.529865	0.502006	0.520809	0.523132
5.122	4.956	50.126	50.542	0.459524	0.446442	0.42944	0.464264
5.158	5.196	50.52	50.504	0.544226	0.549051	0.530932	0.576703
5.214	5.266	51.368	51.846	0.48331	0.464215	0.517812	0.46023
4.934	4.83	47.366	47.584	0.479557	0.487329	0.440169	0.517779
5.06	4.882	48.652	48.086	0.512616	0.47821	0.477785	0.50082
5.118	5.146	49.88	50.364	0.494107	0.483806	0.496519	0.487786
5.068	5.132	49.772	50.006	0.447762	0.510559	0.473284	0.495659
5.064	5.044	49.728	49.476	0.511069	0.477933	0.479025	0.500726
5.028	4.84	49.906	49.902	0.495479	0.520913	0.487362	0.521586
5.244	5.294	51.952	52.642	0.492887	0.478041	0.447924	0.495638
5.152	5.132	50.344	50.534	0.495553	0.510597	0.47682	0.523714
5.044	5.148	50.332	50.158	0.498563	0.490742	0.499159	0.495553
4.864	4.684	47.436	46.832	0.438366	0.445879	0.425951	0.438423
5.018	4.79	48.078	48.418	0.535071	0.53181	0.527168	0.530993
5.168	5.166	52.768	52.388	0.478811	0.457311	0.466067	0.46378
4.948	4.89	48.96	48.552	0.531721	0.511161	0.551625	0.512229
5.172	4.938	49.11	50.032	0.541977	0.520579	0.543806	0.523153
5.122	5.102	51.364	51.474	0.493394	0.48132	0.460716	0.512814
5.046	4.922	50.49	50.472	0.458389	0.448048	0.443124	0.469822
4.672	4.678	45.892	45.224	0.594034	0.555475	0.553844	0.576256
5.082	5.186	50.828	50.916	0.417354	0.449251	0.422953	0.444813
4.998	5.108	50.806	52.168	0.452637	0.490544	0.471461	0.487679
5.254	5.488	52.778	52.74	0.444099	0.431523	0.395119	0.468247
5.122	4.668	49.834	48.792	0.492724	0.508694	0.50007	0.511993
4.718	5.05	47.998	47.974	0.571285	0.515722	0.525863	0.554118
5.4	5.424	52.882	53.01	0.45281	0.475996	0.447347	0.498479
4.974	4.774	48.858	49.454	0.512953	0.527196	0.522573	0.526885
4.906	4.964	47.868	47.868	0.513416	0.480596	0.467425	0.518239
4.784	5.08	49.296	50.06	0.540329	0.555829	0.544703	0.554704
4.984	4.954	50.302	50.398	0.467255	0.450838	0.450189	0.474783
4.844	5.018	49.102	49.838	0.505437	0.495158	0.468816	0.519658
4.828	5.102	49.536	49.036	0.430994	0.502706	0.455984	0.480934
5.094	5.212	51.352	51.948	0.497529	0.491382	0.494402	0.518418
5.032	5.088	50.68	50.634	0.522562	0.481164	0.491131	0.513896
4.606	4.738	47.204	47.628	0.557473	0.517359	0.52989	0.554324
5.454	5.302	52.802	52.84	0.458605	0.468389	0.452156	0.472047
5.23	5.176	52.028	51.604	0.499707	0.468885	0.490722	0.506979
4.924	5.04	49.396	49.32	0.466608	0.464887	0.435697	0.495222
5.112	4.996	49.172	49.03	0.490315	0.487164	0.505423	0.480578
5.096	4.886	49.054	49.838	0.500734	0.512167	0.486974	0.520711
5	4.972	51.096	50.998	0.534834	0.540744	0.539373	0.540238
5.06	5.06	49.424	49.426	0.525682	0.49913	0.507287	0.512323
5.45	5.306	53.174	53.458	0.4124	0.433614	0.395092	0.434042
5.004	5.038	50.36	49.892	0.539546	0.551718	0.553815	0.546377
4.966	4.978	49.87	49.5	0.533849	0.52474	0.491472	0.552619
5.088	5.104	50.344	49.742	0.506387	0.467776	0.484344	0.50751
5.114	5.22	51.406	51.14	0.495081	0.460035	0.515092	0.474521
5.144	5.068	49.764	49.368	0.494391	0.464127	0.45762	0.501979
5.156	5.332	51.568	50.734	0.50139	0.472753	0.491318	0.482318
4.798	4.736	47.084	46.836	0.565265	0.590693	0.556431	0.575822
4.69	4.788	46.36	46.754	0.499211	0.527862	0.529221	0.516914
5.25	5.102	49.658	50.204	0.451288	0.453546	0.444057	0.45182
5.094	5.36	52.2	52.396	0.461872	0.465938	0.466221	0.458407
4.986	4.918	48.712	48.542	0.500164	0.500673	0.495538	0.513829
5.066	5.198	50.688	50.282	0.473008	0.455263	0.464869	0.465203
5.138	5.138	50.196	49.436	0.517745	0.50136	0.49301	0.507729
4.962	4.974	49.23	49.508	0.51291	0.48145	0.490062	0.510228
4.982	5.134	50.182	49.886	0.452121	0.463608	0.466513	0.473769
5.134	5.258	51.794	51.876	0.479306	0.477859	0.457578	0.489511
5.194	5.328	51.552	51.878	0.449377	0.465683	0.447326	0.45882
4.984	5.012	49.902	49.322	0.46929	0.454596	0.438518	0.481752
4.87	4.984	49.896	49.71	0.47489	0.535347	0.477053	0.511041
4.872	5.126	49.4	49.46	0.468199	0.479265	0.480828	0.475225
4.854	4.676	47.74	47.916	0.444864	0.480686	0.450324	0.474171
4.916	4.89	49.01	49.022	0.458275	0.437415	0.468204	0.444568
5.052	4.944	49.23	49.132	0.553244	0.509389	0.52605	0.52981
5.192	5.078	50.546	49.4	0.52168	0.496801	0.508091	0.524776
5.08	4.93	50.032	50.566	0.462809	0.437312	0.419119	0.457843
4.988	5.104	50.074	50.896	0.473106	0.434373	0.454318	0.450946
5.064	4.758	48.844	49.454	0.470664	0.451199	0.439214	0.474088
5.074	4.958	51.2	51.23	0.5949	0.581851	0.583636	0.584466
5.058	5.028	48.932	49.386	0.422359	0.475349	0.441924	0.462642
5.11	5.05	50.554	50.818	0.470296	0.462284	0.476685	0.466299
5.272	5.148	51.218	50.754	0.455047	0.434456	0.434459	0.45688
4.766	4.848	47.46	47.684	0.453968	0.502415	0.482166	0.485629
5.284	5.312	51.134	51.332	0.500475	0.530284	0.497185	0.517496
4.838	5.01	48.014	48.606	0.502013	0.521024	0.528221	0.522197
				0.491029	0.490181	0.483043	0.499082
				0.0372744	0.035082	0.0386927	0.0336281
