# Supplementary material for: Pathway dynamics can delineate the sources of transcriptional noise in gene expression
Source: eLife. 2021 Oct 12;10:e69324. doi: 10.7554/eLife.69324 (PMC8608387; doi:10.7554/eLife.69324)
Supplement: Table 3—source data 1. [file elife-69324-table3-data1.xlsx]

## Sheet: Row 1 
M1	M2	P1	P2	MP1	MP2	DR:MM	DR:PP
49.882	49.676	1077.14	1075.17	0.000602597	0.00230231	8.56326e-05	0.321519
50.328	50.146	1145.56	1144.48	-0.00135834	0.00307948	-0.000398574	0.385282
50.478	50.012	1116.45	1114.7	-0.00109053	-0.00276156	-0.00115729	0.339415
50.004	49.728	1085.1	1087.64	-0.000310955	-0.00119471	0.000655654	0.347038
50.068	50.196	1122.44	1125.52	0.00137904	-0.00217006	0.00041491	0.445899
50.142	50.056	1175.47	1174.22	-0.00639102	-0.00771695	0.00107871	0.397072
50.276	50.284	1094.69	1100.12	0.000330881	0.0109299	0.00167482	0.353949
49.652	49.626	1107.9	1106.66	0.00576409	0.00248537	-0.000616547	0.404922
49.848	50.19	1121.22	1117.31	-0.000825714	0.00475159	-0.000404955	0.318663
50.144	49.89	1204.2	1207.46	0.00217454	0.000511928	-0.00131942	0.406951
50.224	49.77	1118.62	1115.49	0.00210141	0.00590022	0.000496871	0.407781
50.14	50.32	1125.15	1126.65	0.0053195	0.000853584	-0.00178745	0.443857
49.832	49.94	1162.52	1161.03	0.00161258	0.011669	-4.91538e-05	0.375112
49.6	49.798	1182.06	1181.95	0.00312968	0.0105858	0.000404537	0.474595
49.884	50.118	1147	1151.93	0.00506486	-0.00771307	-0.000822542	0.450212
49.664	50.09	1134.97	1130.09	0.0072646	0.000506508	-0.000697532	0.351201
49.502	49.854	1116.29	1120.35	0.00285464	-8.83872e-05	0.000145879	0.400903
50.002	49.984	1130.98	1127.58	0.00328344	-0.00382148	0.000872401	0.322534
49.93	50.224	1131.3	1132.63	0.00247618	0.00130027	0.000988417	0.320653
49.822	49.938	1114.06	1115.47	0.0114215	0.00138397	-0.00033388	0.396405
49.994	49.68	1126.81	1125.49	0.00491776	0.00872575	2.98862e-05	0.389533
49.534	49.898	1137.12	1140.18	-0.00169013	-0.000151079	-0.00034521	0.373567
50.014	50.204	1145.77	1143.41	0.0038909	-0.00329592	-0.000203065	0.470439
49.584	49.91	1123.84	1120.97	0.00588403	0.00322083	-0.000463781	0.341727
50.608	50.042	1130.82	1136.52	-0.00517416	0.000532916	-0.00105859	0.446565
50.56	49.89	1167.15	1167.39	0.0097259	0.0030302	9.83557e-05	0.371519
50.276	50.108	1181.03	1178.37	-0.00842065	0.0062778	-0.00149782	0.478594
49.59	50.868	1072.28	1075.84	0.000750575	0.00351387	-0.000170058	0.351502
50.154	49.6	1111.61	1104.68	0.0117078	0.00638925	0.000359936	0.36797
50.25	50.074	1157.98	1160.78	0.00551936	0.00343092	0.00012962	0.460221
49.83	49.992	1160.81	1163.2	0.00493556	0.00919685	-0.00045668	0.434956
50.054	50.072	1162.76	1166.06	0.000159539	-0.00385571	-0.000270216	0.38674
49.734	49.896	1177.15	1178.44	0.00785043	0.00273246	0.000533132	0.394128
49.85	49.31	1176.72	1170.83	0.00401136	0.000324366	0.000963033	0.439947
50.624	49.862	1184.22	1179.78	0.00185548	-0.00175124	-0.00166956	0.389394
49.618	50.59	1150.93	1154.11	0.00153901	0.00862214	0.000625662	0.390106
50.622	49.792	1151.24	1148.44	0.00909765	-0.0010319	-0.00110459	0.3492
49.432	50.034	1169	1164.36	-0.00469806	-0.000964657	-0.000441872	0.38264
49.608	50.294	1117.33	1120.97	0.00307887	-0.000802549	0.000139457	0.380636
49.87	50.178	1141.34	1146.54	0.000578152	0.000205389	-0.00161404	0.366069
49.482	50.646	1130.71	1132.7	0.000469677	0.00189467	0.000705554	0.391242
50.048	50.114	1088.73	1091.38	-0.000488509	0.00394234	0.000461241	0.468027
49.94	50.278	1189.69	1193.86	-0.00128816	-0.000407673	0.00118629	0.423526
49.724	49.678	1141.22	1140.22	0.000958155	-0.00365495	-0.00014395	0.442181
49.456	50.084	1218.65	1223.64	0.00384379	-0.00621478	0.00112366	0.360692
49.872	50.346	1114.79	1111.42	0.00225253	-0.00410908	0.000196457	0.499907
49.748	50.124	1184.95	1184.68	-0.000743656	0.00092376	-0.00081201	0.38192
49.91	50.364	1170.9	1172.43	0.00191131	0.00131896	8.40137e-05	0.377514
50.086	49.644	1110.02	1117.37	0.00465288	-0.00220511	0.00134621	0.377423
49.838	50.556	1220.97	1222.49	0.00484736	-0.00163251	0.00239726	0.374737
				0.00233476	0.00129998	-1.28233e-05	0.394532
				0.00409943	0.00454102	0.00089554	0.0454409

## Sheet: Row 2
M1	M2	P1	P2	MP1	MP2	DR:MM	DR:PP
50.628	50.046	1124.18	1128.57	0.10889	0.102324	0.100335	0.501778
50.656	50.956	1180.26	1175.94	0.0779392	0.0749648	0.0897225	0.497795
49.882	49.482	1130.73	1132.02	0.10611	0.094532	0.0953382	0.456937
50.12	50.198	1138.21	1130.43	0.119905	0.119292	0.107439	0.462961
50.414	51.1	1143.94	1144.93	0.0937221	0.0943897	0.0985089	0.572591
50.028	49.994	1117.59	1118.45	0.0938806	0.0874529	0.0958457	0.558532
50.622	49.608	1145.35	1140.75	0.09342	0.0977177	0.0880189	0.500814
50.82	50.594	1161.91	1162.46	0.102652	0.0967981	0.0995021	0.511295
50.11	50.418	1169.93	1169.41	0.0963805	0.0912557	0.102123	0.609529
50.476	49.982	1148.35	1146.7	0.111352	0.110968	0.101102	0.592655
49.412	49.84	1196.86	1201.94	0.115047	0.122489	0.0995993	0.605928
50.388	50.436	1113.42	1104.6	0.100693	0.0990333	0.097274	0.446161
50.704	50.306	1195.05	1197.1	0.105322	0.101439	0.106918	0.525792
50.306	50.646	1186.79	1180.8	0.121131	0.122676	0.109958	0.605688
50.59	50.104	1152.86	1149.58	0.0979095	0.09627	0.103137	0.493501
48.41	49.19	1111	1109.92	0.093951	0.0923938	0.0984227	0.587344
50.692	50.748	1175.74	1176.19	0.0966378	0.104173	0.085606	0.433192
50.454	49.84	1116.63	1116.85	0.102464	0.0904464	0.102882	0.465041
50.75	50.544	1184.48	1186.24	0.094145	0.103775	0.0999173	0.826065
49.862	49.92	1183.95	1186.73	0.103083	0.0939053	0.0995498	0.555537
50.342	50.044	1180.96	1178.95	0.095139	0.0910898	0.093901	0.6303
49.086	49.044	1104.4	1104.02	0.0770493	0.0837617	0.0948431	0.524496
49.174	50.24	1152.08	1154.27	0.105185	0.107422	0.0974213	0.593402
49.32	49.568	1178.57	1181.68	0.10435	0.0972154	0.0892753	0.513334
48.816	48.786	1088.51	1086.63	0.0853168	0.088851	0.105094	0.410303
50.428	50.37	1196.62	1203.04	0.104339	0.108844	0.105144	0.527572
49.348	49.9	1081.55	1083.48	0.0920194	0.0955498	0.0960337	0.491677
49.578	50.092	1082.87	1079.27	0.106997	0.102016	0.099731	0.563784
49.646	49.132	1141.41	1140.48	0.0945353	0.0944013	0.0940484	0.531608
48.748	49.266	1162.83	1166.04	0.081305	0.0894811	0.0945559	0.518463
50.686	50.162	1198.75	1197.25	0.105544	0.108067	0.094835	0.545962
49.932	50.002	1164.54	1169.05	0.111645	0.113267	0.0978085	0.535224
49.206	49.728	1168.24	1173.77	0.102386	0.106757	0.103855	0.554534
49.232	49.288	1155.48	1153.19	0.0985228	0.113388	0.10381	0.571968
48.842	49.14	1110.82	1110.3	0.0860687	0.0919582	0.102487	0.528457
49.514	49.366	1157.97	1164.16	0.0916129	0.0891659	0.103878	0.492961
49.148	49.072	1112.43	1108.51	0.105619	0.112066	0.0983866	0.641768
49.738	50.526	1159.02	1150.27	0.0900272	0.0949516	0.095619	0.486978
49.948	50.3	1158.68	1155.48	0.13042	0.128484	0.105658	0.568374
49.524	50.358	1123.98	1126.83	0.0899012	0.0963799	0.0983793	0.469917
48.752	49.23	1095.07	1091.64	0.0935514	0.104548	0.109594	0.504355
49.096	48.812	1101	1100.6	0.0987834	0.0981612	0.111433	0.488205
49.988	50.252	1116.28	1114.83	0.0893791	0.0938826	0.0975364	0.506088
49.184	49.006	1105.98	1110.31	0.0736169	0.0872077	0.0971988	0.486971
49.252	49.54	1156.81	1152.27	0.0845878	0.0929808	0.099015	0.51664
50.044	50.144	1158.97	1162.64	0.111274	0.107327	0.0954196	0.680395
50.178	50.166	1189.76	1190.42	0.0920558	0.0929592	0.0925575	0.619745
50.324	50.552	1146.05	1142.53	0.0875499	0.0840747	0.0954492	0.543595
50.128	50.166	1174.6	1167.14	0.0868592	0.0812922	0.0976458	0.418847
49.21	48.838	1134.41	1128.48	0.0999538	0.087821	0.0913075	0.576112
49.662	49.912	1156	1153.63	0.108768	0.0946592	0.101791	0.741236
50.46	50.824	1177.59	1177.01	0.097799	0.0965833	0.0974807	0.624483
51.632	52.152	1150.44	1150.36	0.0830345	0.0869832	0.0930382	0.51249
50.38	50.77	1169.23	1178.01	0.0822281	0.0966275	0.0913995	0.569042
49.656	49.052	1133	1135.6	0.11503	0.117702	0.112771	0.517049
49.22	49.586	1127.13	1127.06	0.103968	0.114021	0.102694	0.507095
51.432	50.262	1143.39	1139.64	0.083352	0.0779296	0.0990381	0.468547
49.592	49.588	1174.21	1174.52	0.0948146	0.0804086	0.0893315	0.522873
51.09	51.31	1189.41	1192.91	0.102849	0.0939548	0.104026	0.524266
50.1	50.02	1099.54	1101.87	0.106248	0.103861	0.106924	0.50245
49.376	49.35	1082.56	1083.65	0.109702	0.104183	0.104692	0.541762
49.36	49.386	1100.23	1101.61	0.104353	0.107869	0.0953952	0.538205
50.422	50	1124.21	1123.43	0.106625	0.110252	0.110925	0.468531
50.19	50.692	1146.59	1149.72	0.0868598	0.0945943	0.0983137	0.589857
48.666	48.814	1158.89	1153.68	0.105035	0.113701	0.104033	0.573312
49.808	50.39	1207.53	1201.64	0.107628	0.111789	0.0995498	0.496437
50.896	50.708	1163.22	1165.25	0.0863261	0.0893933	0.0955741	0.495988
49.774	49.464	1122.26	1122.46	0.1121	0.106265	0.105233	0.610466
50.454	50.572	1150.17	1145.15	0.119352	0.11061	0.0937312	0.533813
49.248	49.664	1105.02	1103.71	0.0916156	0.100754	0.0962807	0.625333
50.802	50.558	1142.75	1145.87	0.0797743	0.0864662	0.0932374	0.507706
49.638	50.004	1142.4	1137.29	0.108495	0.118197	0.106871	0.526976
49.658	49.582	1097.67	1097.05	0.0851054	0.0913855	0.100831	0.426235
52.36	52.188	1206.84	1200.82	0.0888357	0.0723982	0.0949927	0.556122
49.256	49.612	1119.42	1123.07	0.110602	0.110774	0.103305	0.4151
48.56	48.84	1116.55	1120.48	0.0937387	0.110078	0.100268	0.498238
49.806	50.126	1153.91	1151.34	0.108866	0.0961044	0.0974997	0.524192
49.832	49.776	1124.75	1123.92	0.0968022	0.106826	0.0973414	0.463204
48.884	48.966	1144.73	1139.88	0.0932457	0.0906169	0.0993467	0.435265
49.338	49.654	1138.33	1139.61	0.129819	0.134564	0.112423	0.687706
49.696	50.106	1160.81	1165.48	0.0812851	0.0811011	0.0881402	0.488858
49.784	50.146	1157.85	1156.48	0.112386	0.110739	0.0906385	0.58447
50.58	50.84	1182.21	1184.42	0.0945648	0.0912136	0.0987073	0.438644
51.128	50.492	1117.12	1111.09	0.102773	0.111107	0.0929265	0.422024
49.658	49.638	1140.19	1142.2	0.102044	0.0973922	0.0912312	0.458806
50.62	50.188	1163.75	1166.46	0.0930816	0.0990573	0.0978662	0.616141
49.586	50.066	1155.28	1157.27	0.107191	0.115322	0.0979006	0.561537
51.172	50.508	1153.65	1147.09	0.086754	0.0820502	0.0874104	0.52325
50.208	50.696	1097.64	1098.3	0.0985584	0.105251	0.0956665	0.54478
49.782	49.586	1150.76	1151.99	0.0997499	0.103996	0.09261	0.493134
48.556	48.224	1111.88	1110.34	0.0958058	0.0930803	0.103622	0.426535
50.702	50.244	1145.08	1146.29	0.104944	0.108044	0.10213	0.524768
50.016	50.432	1159.92	1160.75	0.122873	0.124639	0.103307	0.689471
50.586	50.762	1167.88	1172.76	0.101454	0.103329	0.0961667	0.490521
48.84	48.704	1150.74	1152.53	0.11877	0.106287	0.103798	0.522521
49.106	49.048	1104.34	1107.65	0.0879831	0.100622	0.0959744	0.522552
49.318	50.002	1162.25	1167.45	0.0942718	0.0881563	0.0881168	0.466713
50.248	50.08	1147.62	1144.02	0.0973731	0.0942314	0.0948042	0.5134
50.778	50.88	1169.6	1171.26	0.106701	0.10465	0.103593	0.547677
48.358	48.954	1133.6	1141.23	0.0844675	0.0856733	0.0959985	0.463441
				0.0990623	0.0997516	0.0987207	0.531544
				0.0115453	0.0119151	0.0058376	0.0707073

## Sheet: Row 3
M1	M2	P1	P2	MP1	MP2	DR:MM	DR:PP
50.168	50.62	1163.82	1167.51	0.197077	0.194451	0.20659	0.653963
50.052	50.178	1215.95	1222.7	0.262793	0.257393	0.215429	0.853629
49.676	50	1131.24	1131.01	0.176131	0.171984	0.202239	0.615256
49.624	50.084	1147.43	1148.76	0.15632	0.169847	0.174658	0.704464
50.188	50.46	1123.74	1126.3	0.202331	0.20989	0.215449	0.581995
48.316	49.042	1153.57	1145.9	0.205703	0.208155	0.205546	0.732216
50.562	50.154	1138.75	1139.45	0.19341	0.195269	0.202149	0.913175
51.376	51.344	1223.61	1222.79	0.204473	0.206447	0.193355	0.655273
48.58	48.89	1088.58	1084.37	0.170333	0.16309	0.209441	0.512181
50.13	50.036	1094.22	1092.78	0.211298	0.219656	0.206373	0.588305
48.336	48.614	1141.46	1142.92	0.16754	0.158983	0.185966	0.583622
50.072	49.602	1147.72	1147.1	0.213684	0.232424	0.186315	0.728671
50.644	50.456	1204.44	1194.74	0.219854	0.210266	0.172421	1.02252
50.428	50.036	1124.58	1122.43	0.17393	0.186831	0.176706	0.597673
50.742	50.87	1208.1	1205.95	0.179917	0.181998	0.19795	0.621533
50.096	49.828	1152.6	1157.9	0.201867	0.204152	0.197287	0.616235
51.09	51.318	1109.63	1112.31	0.192348	0.197596	0.195155	0.601585
50.574	50.778	1159.56	1155.4	0.205971	0.204355	0.208068	0.697547
48.882	48.802	1072.41	1067.2	0.213464	0.212466	0.219293	0.66088
51.282	50.864	1149.72	1150.14	0.220369	0.232328	0.202034	0.694314
50.976	51.54	1203.42	1207.15	0.218022	0.215705	0.210316	0.779733
48.952	48.982	1091.76	1095.79	0.195562	0.204727	0.213514	0.682842
50.92	50.868	1144.58	1143.21	0.203036	0.195406	0.206182	0.613426
50.202	50.306	1115.06	1116.35	0.210571	0.223161	0.202379	0.688049
50.016	50.64	1141.75	1140.18	0.179404	0.179747	0.186754	0.628546
50.816	51.168	1115.68	1126.46	0.202318	0.188268	0.215535	0.571301
51.72	51.31	1166.97	1165.39	0.201977	0.203846	0.216191	0.565308
49.428	50.086	1118.56	1127.51	0.241057	0.229808	0.205852	0.751412
49.036	49.748	1082.24	1080.81	0.20989	0.202881	0.212135	0.631803
49.88	49.832	1179.76	1192.98	0.20421	0.200102	0.215123	0.67148
51.15	49.882	1195.3	1195.76	0.19541	0.193416	0.206081	0.67201
51.592	51.128	1221.37	1217.13	0.202056	0.192607	0.204275	0.638005
49.268	49.256	1209.98	1217.51	0.18705	0.195645	0.190026	0.730158
49.172	49.358	1103.33	1106.81	0.215389	0.211936	0.215749	0.58832
49.276	50.006	1120.83	1121.57	0.210926	0.205222	0.206584	0.631888
49.656	49.586	1119.42	1117.66	0.226521	0.22549	0.2121	0.775204
51.706	51.144	1183.23	1184.26	0.246792	0.245436	0.218521	0.822211
50.564	50.22	1120.69	1117.95	0.210361	0.215708	0.189903	0.676006
49.248	48.96	1139.52	1138.61	0.239709	0.230737	0.19632	0.900155
48.236	48.726	1121.91	1124.23	0.181336	0.177529	0.182452	0.712369
51	50.908	1146.67	1149.69	0.179391	0.176242	0.18681	0.683386
50.798	50.14	1173.53	1170.66	0.211486	0.213479	0.208112	0.607917
50.96	51.812	1131.53	1133.22	0.172921	0.180501	0.185712	0.598623
50.696	50.744	1129.2	1129.47	0.205642	0.210556	0.209694	0.687307
49.758	50.326	1152.08	1158.72	0.206238	0.218597	0.206819	0.593249
50.302	49.506	1130.13	1130.42	0.198603	0.19672	0.192443	0.612183
48.636	48.774	1174.07	1179.31	0.208198	0.210871	0.202862	0.907194
50.372	50.774	1216.31	1217.43	0.19016	0.187615	0.203777	0.733937
49.236	49.106	1077.37	1074.62	0.227561	0.219976	0.201606	0.754463
49.456	49.172	1171.39	1174.34	0.228772	0.228796	0.222391	0.703443
				0.203588	0.203966	0.201973	0.684939
				0.0209935	0.0206357	0.0122015	0.10268

## Sheet: Row 4
M1	M2	P1	P2	MP1	MP2	DR:MM	DR:PP
51.852	51.764	1177.7	1176.14	0.478704	0.47165	0.476559	0.879611
49.014	49.354	1088.42	1100.6	0.454907	0.462434	0.480567	1.00167
55.232	54.896	1297.27	1295.53	0.485901	0.483523	0.511439	1.08108
48.642	49.042	1172.38	1166.54	0.526254	0.529006	0.504212	1.16519
53.052	52.994	1226.9	1222.49	0.547327	0.552847	0.527696	1.21292
49.14	49.15	1086.74	1081.66	0.57628	0.597132	0.591616	1.28978
49.938	49.52	1085.05	1077.99	0.536304	0.53379	0.533277	1.05673
50.936	50.482	1183.42	1177.52	0.482737	0.490247	0.487936	1.04515
50.178	49.548	1122.12	1124.91	0.50608	0.530518	0.487831	1.20847
49.908	50.256	1171.47	1175.18	0.562726	0.549061	0.531703	1.32373
48.742	48.764	1079.75	1080.34	0.483289	0.485985	0.529555	0.94446
52.526	52.612	1217.97	1215.76	0.467191	0.475045	0.505552	0.978622
48.674	49.418	1102.66	1105.55	0.498094	0.489751	0.513318	1.00967
49.952	49.874	1162.18	1159.96	0.485845	0.477262	0.453261	1.01524
50.932	51.078	1171.18	1168.61	0.533612	0.528089	0.557309	1.03254
52.248	51.698	1190.44	1185.52	0.508812	0.519871	0.477245	1.31554
51.518	51.62	1172.36	1168.76	0.433584	0.436598	0.446843	0.993364
49.74	49.302	1136.93	1135.81	0.484054	0.492165	0.462771	0.985274
50.04	49.964	1091.96	1091.21	0.48467	0.476495	0.49012	1.0146
53.048	53.736	1130.82	1135.61	0.504362	0.509001	0.526724	0.899137
49.05	48.474	1135.08	1136.83	0.539158	0.523585	0.509634	1.17653
50.858	51.422	1138.37	1140.52	0.502394	0.513296	0.535237	0.956429
51.1	51.91	1119.57	1119.09	0.487995	0.492295	0.512107	0.920005
50.43	50.496	1128.74	1132.91	0.535112	0.53735	0.497568	1.13818
48.456	48.716	1000.96	1005.19	0.49084	0.48763	0.53541	0.943233
50.016	50.754	1153.31	1154.89	0.458313	0.456346	0.466668	1.05175
49.016	48.424	1101.25	1101.93	0.4881	0.492974	0.49709	1.03944
47.6	48.438	1061.79	1064.3	0.50118	0.53244	0.528699	1.01297
48.398	48.05	1160.76	1162.24	0.473896	0.4847	0.451778	1.29287
49.056	49.31	1082.83	1088.53	0.471719	0.466318	0.499356	0.946143
46.756	48.016	1114.58	1121.42	0.514464	0.513051	0.516229	1.23462
50.692	50.448	1119.74	1125.14	0.568332	0.571136	0.550314	1.09643
50.64	50.572	1033.56	1039.51	0.506911	0.511936	0.533433	0.927624
49.622	49.698	1069.48	1072.19	0.531016	0.550281	0.525094	1.05703
52.024	51.748	1110.79	1112.66	0.50799	0.500317	0.51431	0.97081
48.19	48.26	1166.55	1165.64	0.524326	0.517951	0.493912	1.17034
51.43	51.528	1211.91	1216.56	0.51636	0.50661	0.487139	1.23701
50.646	50.722	1091.33	1090.8	0.394113	0.393548	0.41593	0.879416
47.84	48.016	1045.53	1046.64	0.402335	0.410127	0.480424	0.824349
49.632	49.862	1161.48	1168.94	0.457784	0.476854	0.476868	1.25805
49.474	48.43	1189.09	1182.93	0.546121	0.553255	0.512766	1.18843
50.492	50.716	1076.65	1079.85	0.450735	0.452898	0.479883	0.871338
49.328	49.786	1162.1	1165.09	0.610359	0.622095	0.532966	1.46393
53.966	53.654	1203.27	1204.99	0.523607	0.515316	0.49579	1.1836
51.038	51.848	1203.88	1201.94	0.499144	0.497613	0.496408	1.14625
49.47	49.024	1141.58	1144.27	0.484155	0.485506	0.458106	1.01433
52.484	53.384	1235.69	1232.08	0.473578	0.492081	0.478053	1.15641
52.522	52.538	1248.29	1244.47	0.488435	0.492935	0.450233	1.03177
53.836	53.258	1269.3	1267.01	0.511923	0.511316	0.481227	1.45543
50.508	49.898	1117.64	1113.72	0.46125	0.455066	0.489744	0.922768
51.184	51.118	1117.96	1121.97	0.495877	0.488176	0.513527	0.990328
48.978	48.804	1164.35	1161.41	0.518688	0.51696	0.548813	1.18789
48.142	48.064	1090.46	1096.02	0.499623	0.500185	0.511714	0.912973
48.494	48.688	1129.34	1131.11	0.472413	0.477849	0.489857	1.10809
49.852	49.302	1113.1	1110.1	0.51462	0.511636	0.508072	0.931203
50.194	50.574	1184.61	1185.92	0.565889	0.564039	0.54382	1.10036
50.304	50.272	1160.39	1152.33	0.524215	0.507577	0.490315	1.19196
47.186	47.6	1072.16	1077.69	0.548909	0.54648	0.576742	1.02843
48.442	48.616	1134.36	1138.07	0.519296	0.539876	0.505914	1.09493
50.08	50.228	1129.56	1130.61	0.53933	0.545262	0.522343	1.18213
50.512	51.126	1245.31	1242.64	0.563438	0.565339	0.504835	1.13792
50.262	49.926	1159.75	1159.2	0.478605	0.471668	0.498095	1.06302
52.216	52.206	1197.38	1193.25	0.499965	0.491362	0.518521	0.969044
50.524	51.442	1155.59	1161.77	0.590385	0.594357	0.537566	1.37834
51.58	51.326	1080.07	1081.92	0.519865	0.526892	0.545119	0.982571
51.316	52.008	1221.07	1223.01	0.573989	0.565931	0.541322	1.29814
49.48	49.736	1128.27	1131.36	0.498376	0.483008	0.475577	0.983569
51.414	51.072	1171.19	1171.82	0.473049	0.471706	0.463854	1.11685
51.152	52	1153.42	1155.63	0.449811	0.448088	0.47272	1.05569
52.172	51.826	1193.01	1194.34	0.505382	0.513101	0.504237	1.11409
50.518	50.416	1110.35	1106.42	0.431444	0.442057	0.493367	0.849664
50.43	50.68	1133.99	1133.5	0.487095	0.473717	0.459142	1.08024
48.502	48.574	1070.33	1068.95	0.46834	0.471849	0.496426	1.01375
50.526	50.394	1150.56	1153.59	0.555533	0.565872	0.506667	1.16299
51.65	51.5	1116.99	1113.25	0.444828	0.421074	0.460426	0.968783
50.936	50.968	1127.12	1123.68	0.505571	0.487317	0.478597	1.05235
53.588	53.298	1153.99	1151.61	0.531413	0.541449	0.528182	1.18175
51.134	51.238	1152.4	1155.18	0.483782	0.458608	0.509804	0.962349
52.238	52.51	1207.26	1209.21	0.531265	0.513465	0.480644	1.14409
51.046	50.828	1205.71	1204.28	0.489383	0.486891	0.499146	1.00122
48.508	49.058	1128.67	1137.13	0.490112	0.505288	0.478462	1.03483
48.326	48.846	1115.87	1111.1	0.484297	0.489698	0.513674	1.24552
49.582	49.618	1108.3	1108.77	0.497381	0.524046	0.47885	1.15793
50.688	50.47	1183.5	1180.46	0.572975	0.568842	0.582375	1.1385
50.208	50.392	1174.78	1178.68	0.507195	0.499103	0.508085	1.12645
51.668	51.638	1183.82	1189.36	0.479738	0.504822	0.460512	0.997338
48.054	47.582	1067.14	1064.38	0.519898	0.509121	0.516021	1.15996
48.712	48.54	1086.99	1078.57	0.589793	0.573806	0.607189	1.67714
49.414	49.818	1143.24	1138.03	0.538036	0.528012	0.522484	1.35163
48.88	48.746	1091.85	1085.61	0.623803	0.630857	0.595403	1.20668
49.256	49.36	1184.04	1186.36	0.495133	0.468048	0.513641	0.925643
50.446	51.052	1086.95	1092.17	0.566209	0.586689	0.565802	1.20218
48.246	48.982	1122.89	1128.33	0.482599	0.487435	0.475043	0.981216
50.914	51.164	1115.54	1110.06	0.480585	0.456824	0.480232	0.911995
51.492	51.016	1134.72	1136.78	0.515663	0.507828	0.489522	1.03655
51.334	50.888	1147.06	1147.17	0.492041	0.508443	0.495806	1.01771
48.998	49.28	1121	1119.98	0.506843	0.506372	0.45825	1.18061
50.792	51.058	1207.65	1206.39	0.515709	0.498781	0.50189	1.06935
51.768	52.252	1254.57	1251.98	0.509769	0.507098	0.504482	1.25389
50.208	49.85	1131.68	1125.94	0.471638	0.456177	0.493621	1.02052
				0.505822	0.506164	0.504246	1.08961
				0.0404206	0.0422033	0.0337276	0.14604
