# Supplementary material for: Pathway dynamics can delineate the sources of transcriptional noise in gene expression
Source: eLife. 2021 Oct 12;10:e69324. doi: 10.7554/eLife.69324 (PMC8608387; doi:10.7554/eLife.69324)
Supplement: Table 4—source data 1. [file elife-69324-table4-data1.xlsx]

## Sheet: Row 1
Lambda: 0.5	Mu: 1	Kn: 150	Km: 10	Kp: 2	deltap: 0.1
N1	N2	M1	M2	P1	P2	NM1	NM2	MP1	MP2	NP1	NP2	NN	MM	PP
5.59	5.214	53.562	52.314	841.592	868.712	1.1252	0.99751	0.499656	0.510991	0.364966	0.458812	0.226958	0.318782	0.548317
4.632	5.002	49.802	52.206	833.304	827.112	1.19036	1.45305	0.45626	0.539592	0.425129	0.3565	0.35855	0.315302	0.55058
5.038	5.3	49.592	52.502	908.404	885.072	1.16065	1.45734	0.43191	0.5568	0.294145	0.442938	0.330179	0.340327	0.619406
6.066	5.192	57.406	54.966	944.11	918.448	1.29779	0.917625	0.51442	0.391931	0.475459	0.317139	0.308839	0.396131	0.550216
5.708	5.366	54.77	51.316	881.392	888.566	1.18019	1.08673	0.420511	0.417982	0.269961	0.309129	0.174395	0.209947	0.457675
5.442	4.346	52.248	46.662	809.878	788.418	1.13106	1.05379	0.461632	0.389216	0.412328	0.379172	0.296864	0.26555	0.514036
4.93	4.938	53.148	50.684	867.284	883.42	1.36162	1.31695	0.519318	0.457348	0.582657	0.430852	0.560909	0.362323	0.583289
4.786	3.922	47.97	44.442	856.444	844.278	1.22931	0.930454	0.52961	0.534246	0.516827	0.409112	0.545627	0.357313	0.4966
5.058	5.078	49.842	51.542	807.018	855.728	1.27745	1.28983	0.404458	0.512522	0.230777	0.385973	0.431218	0.385931	0.576799
4.974	4.63	49.054	50.208	843.108	845.358	1.29416	1.0584	0.541855	0.403737	0.457718	0.270094	0.222523	0.238877	0.578102
5.606	5.294	55.35	53.708	886.932	860.372	1.15203	1.03431	0.464706	0.376693	0.36521	0.3384	0.257736	0.335907	0.473159
5.29	5.686	50.116	51.544	826.532	827.434	1.21321	1.37038	0.470461	0.406445	0.359943	0.32902	0.392856	0.211846	0.544511
5.69	5.396	55.544	54.956	937.612	905.084	1.14973	1.12412	0.581853	0.505349	0.540184	0.379824	0.342498	0.367867	0.693262
5.648	5.238	53.834	52.554	885.446	901.004	1.16502	1.13401	0.471131	0.518146	0.400152	0.36141	0.440974	0.245884	0.541995
4.96	4.87	50.354	48.994	830.732	822.732	1.23215	0.975258	0.435364	0.408936	0.365603	0.273654	0.0391092	0.228834	0.517827
5.192	4.816	52.61	53.308	919.384	905.66	1.2177	1.02764	0.519899	0.452549	0.381239	0.315032	0.25724	0.310622	0.666198
5.278	5.252	49.522	52.188	886.8	861.956	1.13119	1.28839	0.433148	0.520707	0.447395	0.405826	0.393136	0.328363	0.608173
5.048	5.366	50.708	50.722	838.068	831.412	1.09298	1.10798	0.429054	0.379526	0.291791	0.324742	0.226107	0.166229	0.469275
5.9	4.92	51.32	51.822	917.74	896.198	1.23316	1.12442	0.524016	0.489453	0.478724	0.447146	0.46455	0.250614	0.527161
4.79	5.216	49.762	48.708	842.678	867.096	1.31712	1.25768	0.504152	0.510737	0.447788	0.304164	0.32378	0.316078	0.630216
5.216	5.156	53.262	51.878	929.546	932.696	1.2399	1.18751	0.506956	0.450392	0.361232	0.304355	0.338314	0.436329	0.594929
4.906	4.726	48.636	48.442	845.174	818.738	1.10895	1.17139	0.432867	0.441835	0.306935	0.348514	0.0217916	0.0570545	0.55604
5.828	5.898	53.088	56.142	865.238	913.764	1.14934	1.11963	0.534145	0.534232	0.485858	0.365356	0.32953	0.274876	0.596974
5.582	4.77	53.478	46.824	875.496	860.654	0.969484	0.970013	0.4664	0.456948	0.439168	0.453979	0.287732	0.218006	0.630173
4.732	4.98	47.208	50.354	857.808	850.746	1.33508	1.21263	0.543612	0.527825	0.44616	0.289505	0.116703	0.345391	0.597669
4.82	5.438	55.646	53.974	920.656	929.228	1.24528	1.3035	0.43991	0.501511	0.361896	0.481751	0.305475	0.274365	0.487809
5.236	5.16	52.184	48.894	885.436	854	1.09134	1.23239	0.440501	0.463285	0.313361	0.490423	0.180919	0.300541	0.516674
4.406	4.494	47.838	45.322	837.22	812.802	1.2708	1.26645	0.497471	0.375271	0.368813	0.366381	0.158567	0.187604	0.476967
5.1	4.634	50.85	46.744	895.044	880.216	1.17224	1.03082	0.469431	0.494388	0.367071	0.350459	0.219561	0.368536	0.616733
5.676	5.718	58.176	53.78	951.36	924.322	1.10362	1.06958	0.517817	0.447546	0.463605	0.459805	0.294057	0.266161	0.556998
5.408	5.256	50.634	49.95	849.572	823.012	1.24355	1.19098	0.479794	0.483623	0.379799	0.436025	0.195066	0.256812	0.549731
5.444	5.234	50.542	51.994	907.192	891.886	1.11581	1.03107	0.446623	0.429811	0.404751	0.327897	0.32845	0.19854	0.597445
4.972	5.458	51.072	53.698	885.146	898.144	1.35191	1.18313	0.526897	0.477075	0.48122	0.324217	0.52287	0.245053	0.559908
5.462	5.136	51.316	53.42	910.134	906.104	1.29238	1.2906	0.505845	0.54343	0.392072	0.470097	0.427092	0.3841	0.632894
5.284	5.364	50.518	52.306	901.696	903.374	1.14758	1.07032	0.40146	0.418092	0.331356	0.287753	0.253145	0.268089	0.566295
5.258	4.938	49.61	47.462	835.702	841.848	1.12144	1.13085	0.568132	0.426865	0.486438	0.40556	0.198672	0.308649	0.595983
5.424	4.406	53.066	46.632	812.474	827.448	1.29674	0.973512	0.58035	0.44295	0.582005	0.387635	0.221542	0.338791	0.590376
5.422	5.05	51.248	50.504	900.314	872.576	1.25115	1.30139	0.501464	0.39739	0.409242	0.360369	0.383253	0.343257	0.571424
4.516	4.792	47.848	46.946	852.384	816.088	1.3878	1.21445	0.548457	0.41719	0.452295	0.371874	0.265834	0.39572	0.52198
5.344	5.4	52.686	49.074	857.76	833.022	1.15293	1.15033	0.427638	0.508663	0.430081	0.524541	0.294251	0.163121	0.576744
5.76	5.14	53.744	52.924	853.364	842.108	1.15537	0.962765	0.414796	0.41886	0.355303	0.281932	0.404695	0.359857	0.479313
4.93	4.974	47.664	48.456	823.394	801.48	1.42192	1.50849	0.44792	0.553263	0.259552	0.532469	0.479234	0.433684	0.701085
5.746	5.314	53.06	53.664	856.354	893.25	1.09981	1.06378	0.43896	0.516049	0.314835	0.433028	0.402576	0.292418	0.547441
4.878	4.386	47.408	46.932	842.298	804.406	1.21738	0.973511	0.483037	0.338202	0.299423	0.189158	0.372099	0.315932	0.538001
5.088	4.81	49.692	49.86	865.27	910.208	1.2782	1.26085	0.381795	0.532223	0.24976	0.460938	0.288021	0.318708	0.535323
5.098	5.4	54.582	47.594	903.478	841.832	1.19149	1.33375	0.462271	0.385063	0.351697	0.420089	0.282549	0.465692	0.493845
5.18	5.046	54.972	52.434	880.454	860.806	1.15923	1.1334	0.522365	0.440128	0.420455	0.416227	0.180009	0.262717	0.632573
4.998	4.834	51.96	48.674	813.884	844.532	1.27532	1.15905	0.535932	0.474651	0.463239	0.363952	0.384608	0.416475	0.551307
4.998	5.664	48.074	50.246	842.422	818.346	1.13287	1.23836	0.35548	0.503073	0.292787	0.394453	0.234225	0.191856	0.434922
4.99	5.074	52.032	51.772	835.974	848.662	1.13873	1.16806	0.507919	0.464397	0.414442	0.361168	0.346467	0.329204	0.527489
4.968	5.72	49.1	53.07	815.522	787.916	1.24133	1.55021	0.469639	0.517608	0.352751	0.4626	0.268442	0.258659	0.499429
5.738	5.14	55.544	51.956	896.344	850.742	0.991066	1.07827	0.424484	0.318989	0.272981	0.301617	0.300013	0.3415	0.476892
5.292	5.41	51.36	48.74	853.366	824.514	1.17609	1.30073	0.529253	0.412093	0.325029	0.469073	0.27832	0.35606	0.603477
5.444	5.162	50.166	49.486	867.368	836.678	1.14205	1.06196	0.438403	0.426671	0.384251	0.352676	0.422242	0.287564	0.576103
5.412	5.278	50.876	50.44	875.838	891.414	1.20971	1.11114	0.44839	0.525225	0.291056	0.397126	0.395107	0.464657	0.562349
5.2	4.772	49.936	48.352	871.04	869.628	1.32626	1.09255	0.470695	0.45513	0.357229	0.393213	0.0372949	0.182762	0.494979
5.068	5.038	52.54	53.034	865.652	862.832	1.09769	1.28379	0.43634	0.516879	0.307878	0.408688	0.209619	0.297119	0.496886
5.182	5.114	52.714	52.016	893.97	892.746	1.14743	1.37668	0.526019	0.535233	0.366503	0.520607	0.331266	0.31447	0.683934
5.49	5.03	49.74	48.304	846.14	833.966	1.23401	1.17055	0.46356	0.541622	0.340857	0.454544	0.448532	0.369984	0.559716
5.146	5.096	47.876	51.828	879.742	876.194	1.24534	1.22816	0.526397	0.476773	0.467399	0.328989	0.340063	0.311009	0.497815
5.664	5.01	54.668	46.914	821.818	825.196	1.06293	0.980152	0.558324	0.430293	0.419996	0.45696	0.618906	0.391427	0.640979
5.14	4.87	50.882	53.498	897.436	880.102	1.25128	1.17937	0.513677	0.471793	0.31277	0.381013	0.260999	0.310203	0.677138
5.132	5.644	53.712	54.352	848.812	868.226	1.12557	1.24614	0.480372	0.519682	0.422253	0.443709	0.3239	0.321033	0.619785
5.39	5.392	51.914	54.464	908.486	914.448	1.24275	1.18522	0.612645	0.456192	0.50054	0.301818	0.476857	0.457013	0.587954
5.446	4.458	49.808	49.176	820.928	832.298	1.11928	0.934327	0.519349	0.433543	0.393707	0.430122	0.393555	0.269039	0.575102
5.486	5.09	53.53	52.18	897.784	922.248	1.08828	1.05495	0.43548	0.520009	0.365312	0.456775	0.262749	0.318587	0.584454
5.262	4.29	51.792	47.842	842.086	827.12	1.21002	1.03589	0.564131	0.393651	0.503617	0.322815	0.313555	0.367892	0.675391
5.044	4.798	48.964	46.142	863.708	836.984	1.09841	1.18446	0.384359	0.501079	0.36116	0.454959	0.306089	0.400293	0.513966
5.152	5.038	51.122	51.172	854.24	845.848	1.23782	1.20792	0.608817	0.475303	0.420458	0.350955	0.258503	0.347696	0.505585
5.008	4.89	45.956	45.066	826.812	844.128	1.261	1.24934	0.469328	0.519599	0.438851	0.481327	0.548396	0.274066	0.525104
4.654	4.872	48.558	44.888	869.712	825.994	1.24748	1.20398	0.583858	0.358883	0.407205	0.310878	0.21732	0.214296	0.589973
4.648	4.856	48.28	48.31	845.848	852.136	1.47353	1.48627	0.526038	0.54695	0.505386	0.393261	0.479514	0.373631	0.580434
4.928	4.942	52.14	51.116	895.684	892.992	1.25292	1.14453	0.46018	0.370767	0.385691	0.327261	0.38649	0.272891	0.485407
5.246	4.37	51.86	50.264	878.402	856.608	1.30381	1.01276	0.417483	0.468477	0.363019	0.41613	0.546479	0.41541	0.487637
5.472	5.202	53.988	50.152	873.71	890.686	1.1401	1.0289	0.454423	0.435298	0.364703	0.335157	0.207849	0.334703	0.569338
5.708	5.442	52.546	55.098	862.31	899.402	1.02974	1.10952	0.416323	0.438809	0.398906	0.387039	0.279769	0.305708	0.47589
5.216	5.516	51.224	53.026	858.528	839.712	1.14827	1.15419	0.393866	0.417952	0.401293	0.35598	0.325436	0.254018	0.499655
5.134	5.234	48.948	48.148	865.802	847.648	1.19222	1.15336	0.411714	0.452114	0.2582	0.385771	0.358296	0.281151	0.517559
5.502	5.322	51.218	52.264	900.014	867.102	1.24686	1.07058	0.358306	0.433154	0.325791	0.287024	0.0820706	0.231866	0.446455
5.04	4.646	49.754	47.85	863.858	833.87	1.30988	0.959547	0.561427	0.367115	0.552529	0.315	0.625793	0.383124	0.48951
5.312	5.292	51.956	49.98	811.292	813.352	1.17006	1.08002	0.561197	0.416798	0.471326	0.336894	0.233432	0.314345	0.490288
4.824	5.496	48.328	51.256	814.26	841.334	1.48535	1.46695	0.505731	0.401249	0.464105	0.306549	0.533086	0.402797	0.484544
5.174	5.684	47.938	51.828	868.11	867.216	1.28549	1.25876	0.502739	0.536944	0.293132	0.327579	0.233626	0.310392	0.534228
4.796	5.02	49.134	51.824	871.054	852.052	1.07162	1.15006	0.408646	0.364087	0.305257	0.275126	0.183125	0.250733	0.453839
4.712	5.17	48.76	49.106	849.304	851.27	1.38899	1.39007	0.473272	0.488057	0.389539	0.371392	0.12804	0.265085	0.525777
5.272	5.282	52.874	54.816	943.14	932.912	1.08044	1.3934	0.455474	0.51319	0.337895	0.454216	0.448033	0.281702	0.551287
4.556	5.222	49.284	48.74	920.668	918.612	1.35145	1.40471	0.475093	0.592783	0.413853	0.548843	0.308904	0.274806	0.603676
5.51	6.104	51.054	55.134	872.412	872.416	1.16153	1.29065	0.43875	0.532671	0.327323	0.355946	0.190103	0.234031	0.640793
5.128	5.442	54.456	56.842	865.67	867.794	1.23706	1.38648	0.512575	0.576229	0.487781	0.375032	0.414259	0.366025	0.572048
4.916	5.516	52.586	50.944	875.21	811.314	1.05145	1.28975	0.371533	0.417034	0.150838	0.376906	0.138323	0.279679	0.58441
4.986	5.55	53.73	50.608	913.148	898.034	1.22513	1.3661	0.435361	0.37353	0.301408	0.317828	0.253529	0.31232	0.514658
6.074	5.492	54.634	55.744	838.494	849.498	1.02771	0.956751	0.40487	0.421996	0.299445	0.305827	0.310936	0.23626	0.436716
5.062	5.386	50.866	49.488	865.038	863.218	1.22785	1.32739	0.548658	0.586587	0.480332	0.524042	0.176118	0.315548	0.617701
5.536	5.436	53.49	54.448	903.584	884.806	1.14709	1.18077	0.627854	0.511313	0.564796	0.392055	0.391107	0.401522	0.652655
5.21	5.232	51.666	47.446	829.644	802.484	1.19814	1.3987	0.450557	0.503867	0.361131	0.490447	0.434686	0.421085	0.616737
5.364	5.394	53.062	51.314	891.852	865.304	1.22331	1.29181	0.524852	0.428751	0.436734	0.433056	0.457501	0.324916	0.642296
5.164	4.618	47.778	47.026	845.536	861.764	1.32312	1.02101	0.471031	0.392785	0.398527	0.349243	0.344486	0.316765	0.547599
5.696	4.832	54	51.388	881.242	914.278	1.11752	1.05014	0.515865	0.537293	0.486156	0.488231	0.368681	0.310004	0.563202
5.362	5.556	52.304	54.234	874.106	863.074	0.980767	1.04618	0.419749	0.432562	0.308714	0.347786	0.220866	0.189331	0.492878
5.408	4.754	50.782	49.846	837.078	832.236	1.28824	1.17909	0.581864	0.481133	0.476177	0.443735	0.218814	0.269501	0.496225
5.22602	5.11812	51.3801	50.734	867.885	861.327	1.20165	1.17673	0.481486	0.463929	0.391146	0.384027	0.316024	0.307549	0.555023
0.339309	0.373936	2.41579	2.77099	33.339	34.7988	0.100442	0.146926	0.0590006	0.0604394	0.0819619	0.070144	0.123878	0.0731652	0.0614981

## Sheet: Row 2
Lambda: 1	Mu: 2	Kn: 150	Km: 10	Kp: 2	deltap: 0.1
N1	N2	M1	M2	P1	P2	NM1	NM2	MP1	MP2	NP1	NP2	NN	MM	PP
4.636	4.794	49.672	47.946	854.058	836.02	0.808126	0.826437	0.345865	0.339045	0.230014	0.260219	0.272807	0.270698	0.494427
5.41	5.152	52.896	52.906	900.196	935.796	0.865451	0.73549	0.334112	0.427036	0.354401	0.249791	0.327132	0.324157	0.57459
5.426	5.662	53.432	54.088	863.232	891.3	0.866178	0.771784	0.359807	0.413893	0.333388	0.414144	0.380097	0.282539	0.565242
4.798	5.296	47.93	49.78	842.024	857.818	1.02591	1.00087	0.429696	0.414953	0.382679	0.423955	0.388881	0.355612	0.562316
4.798	4.91	53.262	50.338	876.254	865.426	0.740507	0.809122	0.380128	0.399896	0.278559	0.314983	0.581676	0.300703	0.573704
5.626	5.478	54.046	50.418	833.998	848.88	0.696227	0.759053	0.358101	0.399497	0.231267	0.310717	0.0989275	0.276251	0.51474
5.252	5.56	50.126	51.754	863.442	875.596	0.928183	0.953628	0.423076	0.367674	0.44596	0.358714	0.319287	0.339011	0.519329
5.048	4.942	49.892	49.088	880.25	877.38	1.03158	0.815223	0.470878	0.402484	0.381596	0.277088	0.236442	0.444385	0.583111
5.916	4.772	52.974	49.394	830.382	823.894	0.793707	0.673944	0.45914	0.420965	0.368311	0.374425	0.229243	0.328562	0.597902
5.074	4.762	51.312	48.736	870.15	869.024	0.895906	0.732227	0.383094	0.386549	0.327242	0.318164	0.190329	0.304254	0.5196
4.95	5.01	50.37	51.74	862.308	888.648	0.940199	0.808618	0.354117	0.36829	0.310956	0.266694	0.17093	0.285524	0.502807
5.054	4.288	50.598	45.874	792.08	793.614	1.08441	0.783306	0.445978	0.411206	0.349806	0.335062	0.186167	0.304072	0.562277
5.488	5.246	53.734	53.64	895.81	891.916	0.815915	0.721872	0.343094	0.394037	0.318245	0.344139	0.227685	0.253741	0.575297
5.142	5.556	50.9	52.792	897.232	907.084	0.813892	1.0294	0.410078	0.467521	0.380282	0.345791	0.573413	0.368526	0.589061
4.962	5.064	48.728	51.55	839.482	851.216	0.898986	0.866725	0.378752	0.443261	0.224316	0.299431	-0.11084	0.213663	0.488238
4.794	5.314	50.774	51.472	883.89	860.574	0.910061	0.961503	0.44447	0.356668	0.440544	0.339312	0.485152	0.380976	0.581971
5.792	4.742	53.162	50.498	886.264	902.606	0.820895	0.690548	0.314609	0.317924	0.276727	0.379949	0.399491	0.251225	0.524781
5.132	4.712	50.104	47.54	845.686	860.488	0.803954	0.847806	0.380902	0.389577	0.289066	0.32148	0.276544	0.330495	0.561735
4.94	5.232	54.492	51.944	902.358	886.808	1.03324	0.975101	0.376754	0.389766	0.390795	0.456589	0.41815	0.41704	0.48531
5.184	4.824	52.222	51.76	863.918	855.904	0.871521	0.829306	0.414336	0.401233	0.378063	0.328931	0.335705	0.400009	0.672073
5.498	4.796	49.388	51.018	824.216	843.92	0.894531	0.7234	0.318189	0.403456	0.279933	0.270522	0.394274	0.295004	0.618726
4.976	5.388	49.428	51.12	862.098	853.084	0.823257	0.926651	0.375057	0.404422	0.251303	0.258086	0.244246	0.335661	0.517401
5.672	4.754	52.334	48.38	897.15	862.258	0.824256	0.624448	0.385258	0.366903	0.278981	0.316194	0.435116	0.419869	0.509943
4.64	5.89	52.46	51.846	886.38	874.474	0.886295	1.00777	0.455067	0.353099	0.40715	0.330017	0.272719	0.344583	0.50874
4.728	4.37	46.374	47.712	830.974	856.438	0.808535	0.888733	0.331472	0.353469	0.151517	0.234774	0.330098	0.337491	0.531931
5.478	4.644	55.124	53.062	891.84	880.19	0.882101	0.756398	0.391718	0.373255	0.360213	0.434726	0.208207	0.31946	0.52216
4.736	5.052	48.902	50.236	829.3	811.852	0.872004	0.960608	0.35851	0.414748	0.297661	0.330644	0.388624	0.372185	0.484109
5.172	5.61	51.438	53.67	873.504	898.262	0.962665	0.90706	0.472694	0.419249	0.425546	0.315304	0.341096	0.410247	0.642534
5.42	4.584	54.314	51.792	846.832	841.442	0.896768	0.60554	0.395293	0.335739	0.374739	0.250998	0.340412	0.321289	0.514885
5.068	5.16	51.214	53.166	890.918	904.156	0.93841	0.974706	0.492553	0.501842	0.393067	0.449635	0.347725	0.391115	0.703874
4.682	4.928	50.672	51.1	815.71	820.564	0.849272	0.956893	0.42745	0.351519	0.328044	0.359115	0.260788	0.259133	0.517485
5.248	5.022	52.176	50.748	915.854	926.48	0.768496	0.606486	0.400956	0.294487	0.308274	0.318298	0.357854	0.242657	0.501971
4.958	4.814	52.21	51.03	898.552	876.554	0.793231	0.612239	0.333137	0.346208	0.295062	0.283515	0.0533243	0.216742	0.523849
4.682	4.902	47.672	48.226	829.248	812.686	0.888854	1.02792	0.284762	0.354517	0.194082	0.381907	0.138695	0.202108	0.485357
4.772	4.77	50.22	46.326	868.326	856.972	0.735743	0.755348	0.356403	0.34903	0.328054	0.396516	0.258819	0.27742	0.53464
5.61	4.928	50.766	48.386	816.328	833.292	0.8148	0.801871	0.392684	0.385372	0.350605	0.288035	0.32699	0.295579	0.493535
5.226	5.072	52.606	49.808	875.03	862.782	0.853598	0.836019	0.376953	0.404246	0.33245	0.44157	0.374915	0.334239	0.524519
5.458	5.412	51.572	51.2	858.528	847.916	0.870229	0.794326	0.41069	0.313558	0.388082	0.24294	0.378339	0.261541	0.512391
5.2	5.34	53.328	52.668	893.352	898.912	0.816656	0.947599	0.36434	0.321954	0.368637	0.31278	0.390582	0.269248	0.537249
5.122	5.186	51.886	50.142	839.026	825.944	0.978356	0.853813	0.440644	0.375463	0.417004	0.253755	0.681992	0.409657	0.5198
5.434	5.294	54.186	54.65	944.868	937.942	0.74904	0.897798	0.379537	0.430105	0.192011	0.358249	0.210115	0.309336	0.660346
4.964	4.488	50.3	51.63	864.73	874.716	0.965837	0.776992	0.361167	0.423806	0.319364	0.283138	0.455592	0.306879	0.508953
4.944	5.11	50.408	51.46	868.534	864.944	0.916967	0.877849	0.397143	0.414615	0.404676	0.311046	0.138108	0.305408	0.559721
4.702	5.102	50.676	50.508	808.862	796.798	0.811076	1.05929	0.390032	0.442156	0.322365	0.385912	0.197163	0.356611	0.49883
5.232	4.956	54.372	49.244	854.562	857.472	0.904998	0.860966	0.36402	0.408506	0.263197	0.341076	0.252037	0.34614	0.54493
5.244	5.45	53.914	52.862	883.26	885.814	0.763019	0.956055	0.430834	0.472348	0.374205	0.472746	0.41161	0.364422	0.622958
4.022	4.36	47.752	49.31	846.248	828.622	1.06114	0.92986	0.394272	0.381264	0.315395	0.342058	0.333246	0.375168	0.496668
4.812	4.712	47.868	48.422	818.194	833.656	0.884309	0.870199	0.340499	0.374657	0.267112	0.302591	0.214057	0.260395	0.514929
5.298	5.08	51.296	54.056	897.342	912.778	1.0702	0.904871	0.444877	0.530246	0.351666	0.432546	0.388688	0.422771	0.665378
4.96	5.342	50.882	52.894	868.172	870.578	0.897714	0.847653	0.327412	0.349188	0.275096	0.247882	0.310085	0.239041	0.434935
4.814	4.888	48.32	50.124	833.254	843.834	0.972062	0.953722	0.347179	0.358953	0.286258	0.271096	0.322485	0.273473	0.437974
5.41	4.806	52.358	51.362	831.124	825.27	0.886812	0.805094	0.430965	0.46514	0.319758	0.492824	0.263428	0.368617	0.585303
4.76	5.048	52.324	54.436	933.49	952.762	1.00106	0.966322	0.388958	0.423864	0.322662	0.451692	0.411566	0.365737	0.635673
5.42	4.968	53.966	51.924	910.24	891.264	0.763454	0.714786	0.379815	0.433804	0.249838	0.380826	0.316881	0.307322	0.544973
5.788	5.926	55.684	55.452	892.03	893.512	0.801236	0.853399	0.426192	0.412202	0.25058	0.395959	0.254456	0.349956	0.579084
4.774	5.598	49.856	56.206	869.114	873.94	0.979384	1.05077	0.465125	0.494601	0.396381	0.361025	0.541822	0.433072	0.602558
5.088	5.25	49.622	52.264	823.28	819.67	0.833971	0.918889	0.397145	0.400179	0.309128	0.388677	0.323948	0.362596	0.641393
4.576	4.368	48.148	50.936	851.356	860.19	0.891489	0.892366	0.397768	0.408792	0.328022	0.319643	0.579007	0.33573	0.508708
4.77	5.034	52.544	50.656	820.502	826.238	0.790318	0.733223	0.396821	0.324019	0.375174	0.342387	0.445157	0.341379	0.523361
6.028	5.408	55.888	55.71	929.462	937.812	0.84102	0.76781	0.41039	0.42307	0.403483	0.321735	0.354106	0.346044	0.680146
5.022	4.944	51.64	49.608	888.2	871.454	0.752275	0.874655	0.330178	0.310583	0.268354	0.255993	0.214343	0.288896	0.492545
5.504	5.688	55.774	55.058	902.058	888.796	0.750748	0.865605	0.333396	0.322922	0.20887	0.254936	0.335271	0.325252	0.57319
5.43	5.27	55.096	51.064	869.226	843.454	0.957537	0.908551	0.392528	0.309775	0.314235	0.411475	0.214221	0.395876	0.513518
5.16	5.816	50.658	55.926	882.512	886.422	0.915607	1.1496	0.354368	0.408155	0.361694	0.353044	0.387086	0.284874	0.46305
4.96	5.482	54.75	54.136	891.538	855.734	0.907582	0.952562	0.455418	0.266147	0.425269	0.278477	0.331485	0.341494	0.681958
5.718	4.948	55.516	51.212	916.032	908.678	0.89776	0.738507	0.454018	0.353159	0.383435	0.366329	0.40584	0.344457	0.591953
5.066	5.26	50.244	51.294	836.38	861.246	0.736961	0.81203	0.292419	0.353445	0.173908	0.246073	0.316646	0.259415	0.5055
5.278	5.034	50.632	50.944	878.93	877.202	0.753204	0.896336	0.332196	0.380585	0.236767	0.293801	0.184285	0.250679	0.512558
5.354	5.81	52.848	53.042	882.138	884.11	0.850053	0.893859	0.438333	0.390601	0.320428	0.282082	0.376081	0.313141	0.601489
6.04	5.238	54.844	52.724	904.52	908.926	0.839644	0.846799	0.370333	0.415624	0.369441	0.43077	0.367023	0.276686	0.534589
4.72	5.204	50.348	51.642	839.776	827.834	0.885272	0.937638	0.445933	0.408631	0.373339	0.304558	-0.025491	0.339062	0.580635
5.314	5.042	51.488	49.824	875.38	871.414	0.836259	0.791633	0.414897	0.364789	0.319438	0.26352	0.0544066	0.32486	0.487151
5.404	4.68	54.718	52.102	868.398	855.372	0.782685	0.680249	0.366418	0.345296	0.322614	0.259808	0.189035	0.305509	0.505395
5.748	5.81	55.04	52.526	857.814	851.762	0.821272	0.845152	0.374624	0.372297	0.358573	0.360085	0.406495	0.264118	0.472086
5.2	5.144	49.174	52.906	887.182	884.022	0.994153	1.01086	0.486805	0.453174	0.439455	0.444938	0.221957	0.353334	0.659217
5.39	5.354	51.318	51.728	848.638	860.518	0.94955	0.941197	0.363662	0.444308	0.312094	0.463577	0.466451	0.375286	0.522107
4.492	4.622	46.208	48.712	809.28	786.26	0.989247	1.03163	0.370986	0.403962	0.353488	0.322538	0.305107	0.286307	0.486489
4.94	4.69	50.192	48.334	888.058	876.662	0.797323	0.810755	0.34343	0.390067	0.31703	0.289709	0.212064	0.306346	0.594999
5.242	5.27	50.296	49.422	876.478	846.648	0.874979	0.980084	0.413004	0.385867	0.258388	0.551073	0.186023	0.306325	0.638227
5.436	5.142	52.618	53.316	916.748	879.158	0.818977	0.716197	0.309634	0.343304	0.283481	0.243952	0.251007	0.321718	0.684221
4.694	5.126	48.834	52.208	870.564	861.3	1.00314	1.0671	0.510046	0.405248	0.418762	0.390509	0.397802	0.343447	0.574204
4.866	5.19	50.614	52.002	858.006	851	0.903306	1.0944	0.402383	0.437175	0.348384	0.338815	0.524815	0.411317	0.522732
4.708	5.316	51.144	51.046	832.012	832.882	0.840742	1.03379	0.464318	0.41297	0.327028	0.379303	0.383794	0.3405	0.579149
4.72	5.282	52.222	52.968	875.29	865.3	0.686454	0.792395	0.328564	0.38937	0.202215	0.383904	0.335955	0.327008	0.608908
5.54	5.388	51.2	54.792	872.156	906.71	0.91913	0.967253	0.531451	0.545692	0.508727	0.462107	0.494749	0.380597	0.60848
4.988	5.296	51.49	51.874	860.206	840.294	0.983729	0.951969	0.394828	0.361588	0.328508	0.35736	0.29008	0.363748	0.50119
5.22	5.25	52.156	49.228	903.63	886.666	0.871568	0.848519	0.443072	0.427491	0.359902	0.429429	0.283398	0.231165	0.582722
5.354	5.788	54.878	54.988	870.268	902.642	0.889015	0.919654	0.435928	0.517491	0.488573	0.386102	0.302941	0.367239	0.68704
5.264	5.468	53.456	53.196	905.132	919.974	0.831464	0.961744	0.439152	0.348141	0.305861	0.266955	0.155415	0.294616	0.533362
5.458	4.536	52.452	48.716	893.112	874.92	0.833253	0.76439	0.452793	0.374249	0.345936	0.397592	0.395763	0.285904	0.590541
5.27	4.86	51.296	49.46	843.196	828.258	0.852013	0.803985	0.409872	0.42131	0.371332	0.326802	0.104057	0.272388	0.620154
5.254	5.02	53.504	50.758	910.598	897.944	0.960863	0.762183	0.505078	0.363085	0.451816	0.30467	0.242263	0.339334	0.571564
5.136	5.09	47.888	49.07	823.1	830.566	0.906887	0.854595	0.508591	0.458928	0.450609	0.308143	0.147864	0.214731	0.641763
5.398	5.032	50.234	54.002	850.228	862.326	0.916991	0.81517	0.36763	0.393792	0.344876	0.25662	0.276197	0.248742	0.500078
5.376	4.852	50.988	48.7	858.724	854.416	0.84388	0.704603	0.39219	0.359332	0.390056	0.341105	0.380746	0.347913	0.51422
5.288	4.94	50.588	49.91	874.152	885.714	0.831154	0.838532	0.378315	0.351699	0.357597	0.307085	0.22329	0.314407	0.503338
4.986	5.606	49.58	53.766	877.686	871.228	0.799931	0.980975	0.364078	0.367938	0.337457	0.282463	0.473067	0.274618	0.472621
4.674	4.808	46.412	48.802	845.164	822.144	0.968805	0.912692	0.372509	0.381537	0.320304	0.321305	0.487497	0.351199	0.483307
5.064	4.766	49.578	48.686	842.27	855.384	1.02995	0.983851	0.407612	0.414787	0.421332	0.500247	0.42816	0.377611	0.583126
4.618	5.566	45.93	53.994	826.242	841.828	0.726941	1.14333	0.375993	0.485319	0.201003	0.366102	0.380402	0.287275	0.623368
5.14102	5.10754	51.4292	51.3269	866.858	865.732	0.872983	0.866827	0.39568	0.393454	0.332296	0.341754	0.313432	0.321542	0.554032
0.36036	0.361089	2.30417	2.17974	30.7566	32.469	0.0863725	0.117768	0.0504345	0.0499347	0.0695625	0.0685268	0.130196	0.0532183	0.0613119

## Sheet: Row 3
Lambda: 1	Mu: 20	Kn: 1050	Km: 10	Kp: 2	deltap: 0.1
N1	N2	M1	M2	P1	P2	NM1	NM2	MP1	MP2	NP1	NP2	NN	MM	PP
5.234	5.406	55.608	53.452	960.484	913.142	1.57239	1.62241	0.689293	0.585585	0.904225	0.630805	0.332774	0.373126	0.812056
4.686	5.104	57.572	58.126	996.118	1002.68	1.08512	2.06747	0.600237	0.601888	0.422339	0.255113	0.00991457	0.467053	0.993634
5.816	5.396	55.17	55.934	982.514	940.1	1.5418	1.44677	0.76761	0.618701	0.470919	0.612125	0.780287	0.580059	0.733526
5.788	4.628	57.688	51.772	984.752	961.316	1.98426	0.849836	0.788586	0.536978	0.721573	0.333498	-0.254397	0.436528	0.828454
5.846	6.126	57.56	55.546	968.206	961.816	1.05803	1.42654	0.603008	0.567638	0.183674	0.619772	-0.0809882	0.509715	0.930582
4.366	4.15	53.568	52.01	858.098	854.892	1.77226	1.46391	0.774732	0.84877	0.572199	0.198745	0.26761	0.59782	1.02496
6.804	4.736	55.562	53.588	884.968	894.374	1.46651	2.3317	0.791407	0.680008	0.41259	0.801795	0.674028	0.553345	0.719381
5.218	4.954	51.946	50.244	887.62	855.734	2.36065	1.61281	0.7539	0.501024	0.741391	0.300849	0.606631	0.530042	0.76301
5.938	5.134	54.082	54.39	932.872	956.436	1.56461	0.931379	0.500175	0.621107	0.427513	0.179077	0.678669	0.453374	0.800039
5.638	5.866	55.938	52.78	931.654	952.422	1.7524	1.15284	0.610726	0.569384	0.609616	0.38634	0.127293	0.452869	0.648713
6.528	5.456	53.554	54.688	911.696	903.03	1.55048	1.45339	0.711543	0.670245	0.502764	0.431443	0.547501	0.702367	1.19794
4.206	6.156	52.442	55.984	876.908	876.702	1.65678	2.39023	0.620155	0.543635	0.729564	0.499131	0.212453	0.371418	0.653277
5.41	5.568	56.954	56.692	981.182	947.518	1.72567	1.77078	0.686053	0.808146	1.145	0.681728	0.536384	0.60145	0.983584
5.284	5.654	58	58.246	921.596	927.53	1.27197	1.26986	0.491667	0.72759	0.635923	0.557536	0.933535	0.436159	0.806027
6.228	5.088	56.754	53.728	923.142	889.976	1.28243	1.05385	0.560929	0.556068	0.345697	0.386141	0.0559037	0.637542	0.580662
5.552	6.536	52.99	61.828	925.59	916.106	1.43606	2.89212	0.457878	0.625083	0.209552	0.562637	-0.0505828	0.282411	0.561777
6.926	6.288	62.884	60.286	1010.14	1014.53	2.00093	1.07252	0.667966	0.624709	0.574896	0.533521	1.30798	0.481711	0.830764
4.83	5.838	54.402	58.11	933.138	907.538	1.01487	3.11877	0.711774	0.833396	0.28507	0.962226	0.392111	0.616861	0.812712
4.948	6.026	57.536	56.246	970.972	959.802	1.21599	1.60134	0.583603	0.431721	0.0250178	0.194454	0.185884	0.459633	0.699982
5.998	6.294	53.346	56.428	966.274	994.12	1.32587	1.71537	0.587967	0.68477	0.403834	0.549235	0.290068	0.409847	0.821878
6.082	5.374	59.914	56.032	976.384	977.742	1.73867	1.15196	0.643838	0.720145	0.603984	0.429537	0.04762	0.379413	0.803569
6.358	5.792	56.138	55.688	918.156	921.286	1.65216	1.5531	0.682735	0.710612	0.601391	0.826375	0.477866	0.441115	0.870004
7.268	5.474	60.932	53.15	967.152	956.89	2.19796	0.909769	0.869801	0.422985	0.826667	0.240567	0.665676	0.397109	0.668953
6.006	5.426	56.158	53.454	933.87	928.98	1.63403	1.24872	0.532621	0.505064	0.531248	0.334495	0.659324	0.535991	0.848292
4.906	6.108	51.522	53.854	890.998	856.482	1.38026	2.17118	0.678873	0.439316	0.58801	0.250453	0.192141	0.526786	0.655956
4.974	5.524	58.416	58.136	1013.74	1013.07	2.04463	2.10272	0.96811	0.706584	0.563502	0.467706	0.230536	0.793475	1.51191
4.246	5.802	54.42	54.404	897.064	933.46	2.41296	1.62126	0.70583	0.63688	0.625229	0.767565	1.03989	0.651399	0.824771
5.784	4.372	53.532	58.246	945.508	954.69	1.73755	1.24989	0.47848	0.542501	0.610064	0.15836	1.67881	0.407317	0.585402
5.56	5.08	56.492	56.58	945.104	939.264	2.10793	1.7389	0.665113	0.699339	0.641853	0.379289	-0.127457	0.403299	0.704587
6.712	4.94	61.226	54.172	1003.03	1020.29	2.10838	0.919253	0.965863	0.582586	0.829782	0.381668	-0.143824	0.508782	0.872721
5.638	4.538	53.916	53.03	939.884	942.4	1.23521	0.940909	0.696568	0.608008	0.367674	0.348329	0.0719335	0.538713	0.769273
5.334	5.726	56.762	59.958	919.856	970.592	1.41899	1.47643	0.584911	0.746654	0.400285	0.454648	0.22458	0.339325	0.761048
6.764	6.76	57.98	57.846	1030.07	1026.03	2.29822	1.35503	0.577196	0.737082	0.667154	0.462926	0.779462	0.383286	0.877114
5.82	5.204	57.334	56.378	972.414	973.11	1.54116	1.27732	0.519109	0.619776	0.357115	0.490601	-0.143624	0.414558	0.660777
5.496	5.4	53.386	51.718	877.756	865.036	1.61264	1.45461	0.60561	0.50983	0.571561	0.454279	0.0904688	0.46763	0.682318
6.156	5.05	58.774	56.126	968.032	939.748	1.50288	1.01794	0.625694	0.50376	0.506311	0.468745	0.683506	0.414321	0.721654
5.484	5.62	56.84	56.694	896.28	927.322	1.64088	1.94609	0.728182	0.553898	0.421323	0.406852	0.891655	0.343513	0.643269
5.218	5.728	62.912	52.256	1003	994.166	1.27998	1.27943	0.460389	0.389375	0.267499	0.650307	0.573983	0.391559	0.644492
5.132	5.67	56.908	58.032	1008.79	1003.96	1.66508	0.907368	0.544628	0.681513	0.276321	0.18187	0.0185109	0.423211	0.8314
5.392	6.298	53.256	58.74	893.204	919.68	1.10576	2.10305	0.55411	0.689326	0.130613	0.401823	-0.438313	0.48482	0.751248
6.106	5.192	57.354	54.86	993.86	971.758	1.282	1.0886	0.769977	0.519064	0.26308	0.522394	-0.179473	0.301193	0.838831
5.932	4.55	57.418	53.3	945.998	935.148	1.93639	0.827957	0.637989	0.487707	0.888126	0.260805	-0.00648188	0.290778	0.623503
5.37	5.512	57.688	57.148	935.558	952.572	1.81519	2.07619	0.605565	0.782848	0.545467	0.762794	2.14868	0.85377	0.871171
6.232	5.422	60.882	54.06	914.726	903.106	1.46383	0.933557	0.722261	0.539357	0.396232	0.728756	0.47328	0.453297	0.813927
6.658	5.304	54.048	53.574	863.71	875.516	2.16786	1.22442	0.709268	0.646227	0.610466	0.639657	-0.268363	0.558627	0.790815
5.39	6.228	58.34	58.318	952.088	962.688	1.60965	1.23839	0.526667	0.503362	0.458195	0.257586	0.0252846	0.374701	0.685914
6.238	5.754	56.364	56.19	920.96	929.834	2.18123	1.59015	0.805064	0.83351	1.02906	0.892929	2.0323	0.707547	0.789558
5.334	5.708	53.096	57.098	945.954	953.608	1.18577	1.67048	0.596584	0.738237	0.284154	0.521052	0.114512	0.436565	0.741081
4.8	5.108	52.934	54.97	929.732	927.574	1.33461	1.87767	0.763877	0.639759	0.421678	0.628793	0.751617	0.692902	0.936364
4.964	5.328	53.094	53.232	966.394	952.886	1.59373	2.20347	0.593301	0.643456	0.499202	0.493142	0.6345	0.384661	0.763744
4.22	6.196	58.992	55.186	975.846	938.388	1.67769	2.09932	0.674571	0.553031	0.420868	0.496224	0.626441	0.580516	0.719968
5.296	4.41	55.718	53.742	983.256	972.128	1.53681	1.22627	0.488475	0.539964	0.278183	0.450641	0.00783572	0.455666	0.672684
5.272	5.202	56.32	55.632	947.404	968.482	2.00112	1.46569	0.735965	0.857705	0.836955	0.395678	0.391342	0.549525	0.833744
5.624	5.38	54.468	51.172	919.772	926.194	1.9434	1.4894	0.580516	0.582085	0.591859	0.450259	0.245288	0.50515	0.7031
5.788	6.144	51.052	60.536	895.216	902.242	1.91772	2.39703	0.468442	0.845927	0.438281	0.866062	0.780791	0.472216	0.635852
5.922	5.348	55.026	56.252	918.212	974.344	1.76445	1.66774	0.73714	0.77718	0.530636	0.545957	2.03829	0.734264	0.835489
5.114	5.77	52.58	52.636	962.618	907.07	1.03869	1.77228	0.673041	0.620577	0.242151	0.443328	0.242598	0.530792	0.705235
4.752	6.264	51.568	55.244	941.18	926.126	0.983357	1.64955	0.500294	0.525221	0.139834	0.367152	0.146278	0.257276	0.725729
5.75	6.626	57.576	57.934	929.59	944.252	2.17635	2.45676	0.716567	0.638601	0.664915	0.939359	1.67283	0.665308	0.75012
5.514	5.002	53.634	59.024	934	986.74	1.72066	1.42824	0.636267	0.871584	0.334721	0.313589	0.526595	0.463082	0.87149
5.702	6.86	56.724	58.17	962.134	926.538	1.71642	1.96262	0.655234	0.604045	0.757361	0.425185	0.00169786	0.607242	0.759624
6.618	5.598	57.692	55.568	938.494	939.104	1.69103	1.33659	0.738646	0.855738	0.735833	0.456125	-0.213384	0.33783	0.956273
4.282	5.664	50.154	57.94	880.904	902.96	1.21896	2.66429	0.720789	0.739274	0.770926	0.569588	-0.260579	0.469505	0.97716
5.882	5.484	51.94	50.944	905.212	889.962	1.34549	1.60463	0.476894	0.617295	0.330027	0.692436	-0.221695	0.295215	0.608598
6.446	6.306	58.094	59.45	961.312	999.42	2.35776	1.45225	0.615885	0.649214	0.748941	0.429456	0.122255	0.509021	0.777592
4.628	6.008	53.276	59.508	894.252	920.582	1.86609	2.50726	0.593743	0.813624	0.626146	0.40806	-0.0563264	0.376754	0.760661
4.72	4.796	56.912	55.09	899.15	904.446	1.11141	1.42977	0.487813	0.524615	0.297415	0.277015	0.293596	0.514536	0.628884
4.368	6.078	58.592	54.444	983.71	934.264	1.39407	2.20038	0.612612	0.547082	0.345286	0.477707	-0.163223	0.614493	0.762414
5.13	4.988	51.676	53.856	919.662	898.56	1.51195	1.57753	0.51835	0.520096	0.786983	0.487025	0.572558	0.438221	0.722205
4.542	4.628	56.898	52.454	870.298	866.036	1.72331	1.45496	0.653186	0.630969	0.281466	0.350571	0.638736	0.636527	0.617248
6.01	5.912	56.036	63.942	974.592	979.284	2.76139	3.00292	1.21851	1.27908	1.27332	0.658272	1.57938	1.3918	1.07472
4.992	4.466	53.89	54.302	935.8	945.14	1.94752	1.70597	0.624914	0.628958	0.299501	0.838043	-0.487929	0.399056	0.775396
5.386	5.464	58.588	52.088	879.81	873.496	1.84098	1.25702	0.601659	0.518796	0.471279	0.361967	0.847351	0.589146	0.635566
4.944	5.78	54.368	61.342	976.344	956.984	2.27531	2.89949	0.66019	0.973091	0.668052	0.85128	-0.189358	0.430804	0.903788
5.138	5.02	50.996	50.506	886.22	896.126	1.78925	0.893697	0.497205	0.538967	0.648696	0.256149	0.714701	0.411469	0.710723
5.576	5.62	61.494	59.21	962.466	990.58	2.36251	1.40904	0.886154	0.575822	0.929356	0.602457	0.353799	0.466718	0.787559
5.174	4.952	50.346	52.612	830.02	825.262	1.05528	1.68591	0.503904	0.606342	0.411693	0.714697	0.66242	0.359607	0.59338
4.986	5.12	56.55	52.256	899.894	872.396	1.71782	2.53441	0.710942	0.668865	0.762608	0.713542	-0.0931152	0.312872	0.778357
5.154	5.39	53.04	57.388	948.692	965.278	1.69767	1.67799	0.584265	0.662402	0.327995	0.521808	0.80802	0.331134	0.900068
4.706	5.388	56.994	55.482	894.916	883.812	1.95387	1.19485	0.717285	0.536326	0.920383	0.432322	-0.0985539	0.690599	0.75643
5.478	5.424	49.072	50.892	889.7	912.136	1.55718	2.04573	0.471424	0.639338	0.473929	0.591924	0.622371	0.517241	0.732733
5.202	6.124	55.184	59.048	912.522	925.28	1.1194	2.16497	0.576747	0.769444	0.478907	0.520079	0.105461	0.614195	0.707793
5.856	4.442	59.098	55.67	980.912	974.306	1.91785	0.724679	0.635281	0.664925	0.403553	0.31914	0.68665	0.545828	0.981709
5.346	6.14	51.392	55.392	871.744	890.922	1.23745	1.95803	0.488021	0.655173	0.337015	0.677073	0.330951	0.390591	0.748478
6.194	5.348	57.746	50.774	913.502	922.708	1.5127	1.33968	0.56503	0.453205	0.45661	0.372349	0.575708	0.308498	0.614725
5.218	4.998	51.79	53.688	930.118	934.256	1.18828	2.78911	0.830869	1.39196	0.183016	1.76923	-0.0795916	0.547703	1.4125
5.134	5.244	50.378	58.316	938.436	943.398	1.43251	1.57617	0.754883	0.892936	0.75005	0.439815	-0.194675	0.857774	0.785223
6.09	5.73	56.308	53.644	960.066	947.4	1.29355	1.32464	0.654165	0.53898	0.844498	0.691554	1.53134	0.37793	0.840703
5.808	3.53	55.098	49.842	916.672	899.384	1.86024	0.872688	0.701155	0.513397	0.669559	0.463174	0.377287	0.460353	0.695485
5.972	6.472	59.954	56.794	1011.65	977.144	1.8443	1.79376	0.767822	0.663545	0.795288	0.594947	1.10167	0.659701	0.969494
5.18	4.232	55.102	53.94	937.392	967.092	1.62304	0.962944	0.750294	0.702386	0.465447	0.58741	0.247567	0.483423	0.765624
5.526	4.658	56.958	59.008	962.616	977.244	2.02942	1.17249	0.778146	0.725987	0.742206	0.494994	0.42859	0.564486	0.85188
5.044	5.192	52.65	48.954	899.008	881.808	1.54787	1.6314	0.50203	0.595807	0.40259	0.407871	0.269648	0.393546	0.638034
5.48	5.014	55.196	50.276	881.256	869.85	1.59021	1.13394	0.666259	0.69597	0.235448	0.434283	-0.190313	0.526139	0.79434
6.66	5.108	60.39	55.934	939.046	954.75	1.62742	0.773225	0.719582	0.702059	0.548147	0.353315	1.0771	0.542481	0.846763
6.17	5.852	55.48	55.872	909.334	898.668	1.28578	1.65774	0.633318	0.663613	0.31602	0.687327	0.348475	0.535031	0.657326
5.926	4.35	57.944	63.232	986.192	988.37	1.10701	1.13416	0.629122	0.921398	0.596776	0.397587	-0.590134	0.407151	0.861995
5.092	5.806	55.298	56.406	941.336	933.156	1.62114	2.14355	0.611567	0.803172	0.788205	0.564138	1.10903	0.320469	0.959033
5.976	5.69	56.016	53.626	990.124	974.992	1.55883	1.35046	0.533318	0.661316	0.404514	0.654495	0.407378	0.370022	1.00989
5.86	5.838	55.79	52.67	916.168	892.924	1.74654	2.04511	0.631817	0.711063	0.632069	0.985383	0.475988	0.668479	0.858822
5.53446	5.45452	55.6963	55.4521	936.76	935.406	1.64324	1.61098	0.649677	0.656434	0.535021	0.517385	0.408808	0.497404	0.794192
0.649636	0.618983	2.90283	3.00379	40.7947	41.882	0.366695	0.542695	0.123594	0.153351	0.228658	0.224304	0.551036	0.1546	0.152794

## Sheet: Row 4
Lambda: 2	Mu: 2	Kn: 100	Km: 10	Kp: 6	deltap: 0.3
N1	N2	M1	M2	P1	P2	NM1	NM2	MP1	MP2	NP1	NP2	NN	MM	PP
5.102	5.56	50.214	50.028	284.748	290.71	0.418689	0.430251	0.314089	0.352405	0.275656	0.263638	0.148316	0.250907	0.472928
5.134	5.326	52.248	53.132	282.906	282.478	0.545178	0.500645	0.3498	0.40407	0.336794	0.273628	0.251248	0.284757	0.496407
5.326	5.05	50.292	49.218	280.068	277.968	0.508541	0.434047	0.343832	0.299865	0.342245	0.23962	0.238789	0.252537	0.448025
5.272	4.86	49.878	49.832	280.918	284.174	0.433833	0.442358	0.383933	0.330375	0.259972	0.23202	0.252871	0.259101	0.516181
5.146	5.368	53.016	52.278	296.408	289.696	0.479874	0.432981	0.299735	0.310636	0.266712	0.268191	0.245	0.253464	0.467367
4.7	5.2	48.506	49.024	281.1	281.304	0.434119	0.485663	0.342816	0.313189	0.256759	0.232983	0.16424	0.23802	0.436191
4.756	4.83	48.616	47.792	263.838	254.644	0.537211	0.573754	0.361295	0.316128	0.262414	0.303802	0.157838	0.298287	0.475672
5.072	4.736	49.412	49.262	272.264	269.056	0.425507	0.480981	0.309285	0.318972	0.239182	0.265692	0.197014	0.221268	0.391315
5.068	4.604	48.974	49.252	265.686	273.638	0.481211	0.479233	0.308415	0.358845	0.285742	0.324002	0.265087	0.227616	0.487477
5.096	4.718	50.622	49.564	286.568	286.198	0.525035	0.437574	0.369626	0.335224	0.373093	0.201827	0.236762	0.26907	0.488955
5.036	4.634	49.696	48.358	278.028	283.144	0.531055	0.445689	0.409739	0.3871	0.315291	0.298215	0.286695	0.316203	0.55095
5.01	5.092	48.464	48.008	276.4	276.974	0.582015	0.561761	0.481443	0.430406	0.399013	0.354329	0.422197	0.339763	0.65992
5.206	5.132	49.92	51.596	283.526	286.308	0.426854	0.535678	0.363135	0.364525	0.281651	0.337333	0.216054	0.255875	0.45989
4.956	5.136	51.226	50.03	297.864	285.628	0.557425	0.502659	0.370984	0.32048	0.303138	0.279447	0.349957	0.228398	0.455035
5.13	4.686	48.526	48.364	272.63	276.406	0.523319	0.473917	0.383487	0.293768	0.305754	0.275361	0.320903	0.259608	0.481313
5.498	5.374	52.172	49.834	293.85	286.38	0.440861	0.424253	0.314778	0.271864	0.219373	0.20365	0.174101	0.242453	0.398806
5.386	4.978	51.03	50.972	280.782	283.098	0.47897	0.479316	0.327907	0.347545	0.274242	0.306505	0.32994	0.284508	0.445122
4.96	4.902	50.888	49.668	283.35	289.984	0.427629	0.476013	0.392997	0.356029	0.272406	0.367106	0.217021	0.273119	0.573893
5.126	5.482	51.06	52.912	297.138	298.684	0.502272	0.560615	0.361787	0.372124	0.284624	0.41137	0.292865	0.258691	0.573956
4.9	4.88	47.76	49.756	277.14	282.692	0.553092	0.445995	0.312445	0.305873	0.290609	0.2354	0.19502	0.252164	0.427747
4.818	4.906	49.098	50.972	284.51	290.56	0.498082	0.534365	0.376458	0.389322	0.290639	0.289543	0.218946	0.269548	0.612565
4.944	5.228	48.612	49.896	276.11	280.59	0.438512	0.499963	0.331696	0.348954	0.250853	0.222964	0.250073	0.233391	0.436507
4.614	4.646	47.946	48.042	274.322	278.254	0.5116	0.528683	0.377322	0.412071	0.339631	0.365801	0.257054	0.306227	0.557676
4.748	4.96	49.344	49.54	287.112	289.156	0.44264	0.502135	0.316539	0.361212	0.278674	0.225675	0.195631	0.235689	0.479585
4.946	4.674	49.488	50.37	295.012	303.334	0.411033	0.524307	0.352268	0.365904	0.253727	0.346059	0.250197	0.249015	0.52628
5.204	5.116	50.296	49.626	279.284	271.41	0.474179	0.520117	0.32763	0.379362	0.200458	0.329226	0.25285	0.236687	0.509619
5.134	5.036	52.554	51.138	304.108	304.584	0.478726	0.470464	0.4002	0.370646	0.328991	0.281261	0.277221	0.248114	0.623085
4.572	5.186	46.502	49.482	266.354	274.73	0.455783	0.644948	0.33774	0.384787	0.217856	0.291711	0.17232	0.248611	0.532637
5.178	4.796	51.04	49.412	286.172	289.148	0.488287	0.441529	0.352357	0.368652	0.263767	0.342829	0.294799	0.282954	0.565615
5.18	4.59	48.672	48.53	284.376	283.336	0.479821	0.466739	0.339786	0.360059	0.294561	0.312183	0.130382	0.23896	0.538184
4.678	5.066	49.09	48.874	286.854	279.554	0.464313	0.57602	0.366571	0.353302	0.244034	0.304926	0.283504	0.247238	0.468244
4.622	4.732	48.294	47.486	278.388	278.59	0.544337	0.458791	0.429118	0.404375	0.412993	0.250165	0.214989	0.30608	0.609771
5.336	5.242	50.322	51.1	290.22	297.768	0.517827	0.58563	0.341423	0.380979	0.30497	0.333426	0.371146	0.28979	0.50262
4.724	4.528	50.372	47.688	284.708	282.6	0.505718	0.456266	0.329492	0.28723	0.212508	0.224371	0.275523	0.291104	0.539732
4.564	5.056	47.38	49.934	281.606	278.526	0.564366	0.477929	0.325272	0.344356	0.279431	0.24065	0.274536	0.279909	0.557797
5.248	4.99	50.6	50.77	278.692	272.246	0.515336	0.506388	0.346893	0.331274	0.285318	0.275212	0.26074	0.282562	0.467745
4.29	4.87	48.468	46.312	269.09	262.09	0.490971	0.573512	0.316369	0.321506	0.211541	0.29951	0.0952351	0.287245	0.48936
5.096	5.05	50.828	50.7	287.224	284.712	0.546041	0.520821	0.32803	0.337978	0.258962	0.294231	0.258736	0.246727	0.467817
5.074	4.928	50.118	49.172	291.142	289.374	0.474192	0.442832	0.350229	0.328144	0.24772	0.212954	0.19657	0.279618	0.539239
4.256	4.484	47.766	47.872	274.548	279.998	0.559763	0.551069	0.44046	0.378011	0.398846	0.258512	0.334883	0.248238	0.626904
5.052	5.16	50.244	52.156	289.732	289.008	0.540836	0.553009	0.349136	0.348009	0.285252	0.336041	0.316637	0.246511	0.554931
4.826	5.17	49.174	50.518	280.168	276.19	0.669207	0.576771	0.412023	0.375329	0.427772	0.257003	0.375477	0.339254	0.549977
4.964	4.956	49.654	50.11	290.054	284.892	0.458245	0.530376	0.377905	0.315003	0.30464	0.25918	0.333427	0.2512	0.476401
4.9	4.516	49.256	47.004	281.374	272.634	0.566947	0.404265	0.392574	0.321467	0.342186	0.303367	0.134649	0.209857	0.494958
4.74	4.316	46.842	45.464	267.75	261.058	0.582972	0.466866	0.381155	0.332683	0.306629	0.264346	0.257539	0.266822	0.472545
5.046	5.268	51.798	51.898	285.468	283	0.506925	0.477736	0.373032	0.348589	0.34583	0.306741	0.226682	0.288242	0.534812
5.248	4.886	51.85	49.656	273.526	278.74	0.458371	0.448427	0.297164	0.312695	0.251017	0.277362	0.150379	0.273653	0.448039
5.382	4.926	52.652	50.046	294.928	295.006	0.46198	0.381927	0.341483	0.31374	0.346195	0.293257	0.340994	0.254821	0.499562
4.984	4.896	51.456	51.944	298.952	298.788	0.513571	0.541432	0.340601	0.335986	0.284708	0.320697	0.303223	0.300817	0.461395
4.87	4.59	50.7	50.652	284.01	282.93	0.465763	0.545751	0.405624	0.381509	0.333794	0.366673	0.360969	0.288673	0.527434
4.686	4.734	48.166	48.384	273.104	275.502	0.619673	0.473847	0.390106	0.34495	0.360206	0.239829	0.257484	0.289885	0.521293
5.008	5.008	48.484	49.136	284.188	288.746	0.458233	0.592999	0.342152	0.378836	0.261731	0.374164	0.259927	0.287848	0.511163
5.162	4.688	48.94	47.016	267.996	273.428	0.455776	0.396065	0.289151	0.253163	0.206144	0.166623	0.191733	0.23411	0.413097
5.124	5.1	51.914	50.266	295.562	292.916	0.518092	0.517447	0.315468	0.398053	0.282988	0.327574	0.336946	0.297637	0.557649
5.442	5.148	50.174	50.998	273.898	283.216	0.540083	0.504323	0.322897	0.360636	0.323735	0.301003	0.410974	0.301684	0.413343
5.164	5.034	48.248	47.418	268.942	261.794	0.545622	0.537074	0.35499	0.36087	0.271992	0.39949	0.222653	0.265638	0.513508
4.97	4.946	48.676	48.608	266.452	272.02	0.530767	0.525327	0.380166	0.365392	0.333742	0.292814	0.326522	0.27324	0.513765
5.148	4.806	49.568	49.244	274.298	280.4	0.419868	0.512834	0.323864	0.366463	0.222763	0.336151	0.375133	0.306841	0.480272
4.856	4.73	48.196	48.288	282.374	278.544	0.488451	0.520961	0.366037	0.310808	0.353555	0.274723	0.226547	0.255879	0.569618
4.866	5.126	49.31	51.552	285.114	283.558	0.503292	0.551687	0.316693	0.375379	0.260868	0.224708	0.138547	0.265181	0.495006
4.762	5.16	49.63	48.952	269.912	263.316	0.466512	0.551144	0.350815	0.318255	0.213486	0.278522	0.210338	0.26644	0.497695
4.594	4.716	46.396	47.112	260.216	262.448	0.517386	0.534061	0.36439	0.368609	0.262167	0.277888	0.27799	0.24988	0.464795
4.802	5.09	50.176	51.566	291.266	294.64	0.535129	0.598707	0.384926	0.446075	0.309088	0.319605	0.297861	0.304157	0.584012
4.744	4.576	46.16	46.194	272.992	273.946	0.484682	0.560252	0.387354	0.412845	0.367115	0.359631	0.294273	0.320406	0.609188
5.472	5.114	50.988	50.478	300.34	295.89	0.55218	0.444425	0.380944	0.336544	0.337097	0.252243	0.298061	0.257672	0.496065
4.932	4.98	49.36	50.16	299.192	291.132	0.529833	0.532339	0.414734	0.396615	0.354422	0.450564	0.385058	0.293683	0.702846
5.412	5.328	50.4	49.89	295.926	303.622	0.420452	0.451717	0.326119	0.340799	0.251399	0.310724	0.258705	0.193298	0.489881
5.122	4.842	52.56	48.256	285.54	274.056	0.456939	0.460955	0.354409	0.321716	0.273145	0.284768	0.247071	0.281312	0.46981
4.88	4.624	49.292	47.832	272.66	268.276	0.524231	0.460289	0.317686	0.358435	0.243338	0.272105	0.215581	0.300991	0.486082
4.806	4.61	48.904	45.782	259.196	256.882	0.529656	0.48136	0.347498	0.33862	0.374984	0.344603	0.208144	0.265859	0.475457
5.14	4.812	51.176	48.234	271.744	268.744	0.47329	0.434735	0.353279	0.320722	0.234759	0.237133	0.219262	0.240979	0.519212
4.902	5.254	49.618	49.18	277.502	280.222	0.594125	0.657055	0.369158	0.360071	0.333438	0.326395	0.398267	0.308914	0.507807
5.288	4.666	51.12	49.924	289.102	293.316	0.522138	0.444495	0.311767	0.271529	0.271347	0.256022	0.204114	0.235473	0.395489
4.52	5.092	49.422	51.15	279.388	274.532	0.525084	0.512299	0.380373	0.354992	0.286022	0.280171	0.322517	0.287993	0.527672
5.228	4.98	50.29	50.822	283.024	286.04	0.469758	0.474455	0.341904	0.34865	0.298439	0.335686	0.256493	0.276824	0.513976
4.934	5.258	49.054	48	275.558	264.816	0.509379	0.481245	0.357494	0.31603	0.37867	0.255759	0.223746	0.225501	0.535438
5.218	4.984	53.18	51.048	288.434	281.636	0.503992	0.46888	0.391403	0.363713	0.248768	0.306923	0.232156	0.294681	0.507915
4.6	4.994	48.318	50.526	290.654	285.69	0.51467	0.544298	0.372248	0.360692	0.258604	0.259658	0.254536	0.287928	0.551115
5.106	4.93	50.278	50.86	285.6	290.214	0.473613	0.510379	0.305957	0.338961	0.243469	0.30715	0.26524	0.249915	0.417799
4.914	5.128	50.532	50.782	283.382	286.046	0.508316	0.473146	0.385104	0.354764	0.348726	0.287264	0.261446	0.282114	0.500204
5.168	4.462	51.36	50.61	284.632	289.18	0.501218	0.526597	0.363903	0.327351	0.324398	0.296804	0.327998	0.276406	0.451917
5.016	4.848	50.828	50.832	286.696	288.478	0.484802	0.442261	0.350807	0.330989	0.300875	0.247603	0.247247	0.302811	0.472582
4.852	5.076	48.542	49.572	270.21	268.56	0.518927	0.409532	0.349631	0.353706	0.243305	0.18374	0.21462	0.24799	0.482678
4.846	4.838	50.318	49.654	275.446	272.014	0.484772	0.455477	0.330938	0.357529	0.230977	0.330376	0.180487	0.221618	0.517299
4.94	5.382	50.704	53.63	294.868	299.25	0.672743	0.544104	0.450887	0.384861	0.476234	0.266337	0.389499	0.324367	0.537191
5.522	5.142	52.016	51.098	289.442	291.936	0.423277	0.360556	0.286202	0.288468	0.241931	0.263317	0.178417	0.239099	0.456061
5.316	5.08	52.036	51.418	286.024	283.75	0.524912	0.509373	0.388325	0.356222	0.332915	0.347269	0.296859	0.307166	0.514852
4.858	4.92	47.686	49.14	264.536	268.238	0.470483	0.499479	0.426757	0.409917	0.318754	0.249332	0.311846	0.326659	0.529978
5.152	5.588	50.858	54.392	297.608	295.732	0.469137	0.540419	0.363767	0.333531	0.337535	0.238734	0.226948	0.240448	0.540362
4.784	4.644	48.514	47.818	283.068	278.208	0.479586	0.402498	0.27376	0.302627	0.235243	0.248518	0.201561	0.23878	0.457922
5.358	5.146	51.268	50.118	291.612	284.118	0.475224	0.492699	0.322198	0.327503	0.313203	0.302118	0.285703	0.304312	0.451536
4.81	4.918	47.666	48.3	269.546	274.232	0.42695	0.542782	0.343562	0.372406	0.23363	0.336494	0.286273	0.253789	0.478458
5.38	4.708	50.412	48.904	271.554	278.834	0.475766	0.407516	0.336136	0.345143	0.301355	0.303838	0.229483	0.224361	0.417686
5.242	4.822	51.082	50.516	275.948	272.06	0.441423	0.43039	0.305659	0.286591	0.232132	0.176425	0.117063	0.218855	0.370889
4.526	4.782	46.62	49.432	244.35	258.762	0.407265	0.492023	0.29412	0.360909	0.235988	0.268614	0.159197	0.246053	0.406382
5.014	5.03	51.042	49.496	281.878	277.072	0.539321	0.496487	0.370219	0.36871	0.336372	0.329968	0.330933	0.27027	0.47921
4.424	5.06	47.136	47.768	277.636	267.808	0.605424	0.56848	0.426571	0.434664	0.309908	0.379982	0.396432	0.327042	0.813094
5.292	5.216	50.072	50.8	284.106	279.976	0.467379	0.502487	0.350513	0.329867	0.281509	0.340218	0.291091	0.245346	0.487785
4.784	4.798	49.606	48.69	281.992	280.324	0.479998	0.552006	0.370734	0.370842	0.278742	0.345543	0.296248	0.288305	0.521694
5.322	4.668	50.246	48.616	269.154	267.93	0.508909	0.390665	0.344057	0.323075	0.271939	0.324346	0.196218	0.309441	0.443921
4.99526	4.94902	49.7948	49.6371	281.249	280.94	0.499478	0.495871	0.355059	0.348907	0.292513	0.290795	0.258687	0.269084	0.504509
0.267402	0.253494	1.54576	1.63977	10.3714	10.6418	0.0518679	0.05669	0.0377239	0.0357166	0.0527797	0.0512982	0.0699706	0.030479	0.0662576

## Sheet: Row 5 
Lambda: 2	Mu: 20	Kn: 550	Km: 10	Kp: 6	deltap: 0.3
N1	N2	M1	M2	P1	P2	NM1	NM2	MP1	MP2	NP1	NP2	NN	MM	PP
5.764	5.192	55.814	52.95	323.018	305.956	1.35011	0.731207	0.70635	0.63329	0.681567	0.531986	0.146963	0.39166	0.927197
5.408	5.686	57.402	55.01	337.378	324.818	0.98633	1.10359	0.672977	0.72923	0.860544	0.742811	0.934103	0.500054	1.04265
4.902	5.036	52.804	53.378	306.1	306.336	1.71665	1.1574	0.931474	0.867959	1.05025	0.663411	0.6447	0.856703	0.978424
5.558	4.838	54.26	50.174	311.936	308.744	0.909457	0.652303	0.738597	0.589367	0.409957	0.478585	0.220615	0.413999	1.03269
5.172	4.66	54.904	52.13	307.902	307.866	0.881229	0.537934	0.564026	0.472389	0.460052	0.271158	0.300103	0.443807	0.650647
4.728	4.836	52.078	55.27	303.89	325.166	0.625385	0.895976	0.431116	0.646138	0.309259	0.442528	0.175267	0.335489	0.667533
5.346	5.364	53.232	50.794	290.674	290.452	0.756693	1.16022	0.478311	0.571543	0.32578	0.502833	0.744763	0.386661	0.751495
7.02	5.296	59.366	57.012	334.392	323.616	1.08015	0.744709	0.612383	0.5557	0.591542	0.481483	0.389722	0.349188	0.812156
5.138	5.902	56.198	57.18	310.558	313.134	0.845961	1.20734	0.547943	0.562983	0.529535	0.403428	0.323076	0.414823	0.671513
4.94	5.078	48.49	52.282	284.694	290.226	0.686867	0.807165	0.493602	0.474771	0.383016	0.316475	0.545101	0.254803	0.46869
5.68	6.272	57.906	58.418	317.394	297.82	0.668829	1.3126	0.54065	0.624657	0.324067	0.681307	0.372817	0.478198	0.614792
5.506	5.794	54.924	54.512	312.156	307.738	0.947522	1.14521	0.665969	0.61307	0.597687	0.543105	1.17609	0.445394	0.916318
4.79	4.4	54.838	52.218	294.636	299.45	0.861114	0.653205	0.487865	0.553601	0.340547	0.299337	0.361227	0.495735	0.593674
5.072	4.462	53.622	55.122	313.62	304.308	0.949181	0.723612	0.584287	0.630752	0.460652	0.35788	-0.0802826	0.453913	0.739624
5.508	6.212	63.184	60.246	344.738	336.558	1.37116	0.956433	0.859195	0.540846	0.841095	0.404761	0.514662	0.521764	0.857919
6.05	5.76	52.8	55.82	294.166	292.02	0.871377	1.06521	0.499111	0.612924	0.448507	0.47806	0.390071	0.385446	0.7029
4.922	5.678	52.74	55.946	302.822	307.19	1.03352	0.956612	0.563016	0.667391	0.433464	0.421212	0.145812	0.443566	0.755671
4.86	4.766	52.842	51.792	304.238	296.876	1.10136	0.677169	0.720576	0.569555	0.500433	0.335093	0.615287	0.634268	0.770731
4.544	5.72	53.074	59.918	312.534	325.786	1.00506	1.20121	0.57329	0.663162	0.49067	0.517345	0.385445	0.462347	0.675608
5.206	4.656	54.302	52.392	298.32	295.208	0.829806	0.945869	0.569206	0.583198	0.453867	0.468899	0.509489	0.531369	0.668471
4.45	4.952	53.936	54.17	314.7	322.148	0.804512	0.738598	0.540516	0.573869	0.232536	0.219268	0.373203	0.398618	0.657133
5.314	5.374	55.186	55.902	319.344	317.58	0.796864	1.03142	0.495517	0.557177	0.297846	0.567451	0.428296	0.367318	0.684739
4.992	4.582	53.312	53.866	302.588	295.536	0.929922	0.78724	0.528962	0.516695	0.211085	0.411143	0.0915846	0.460688	0.569373
5.38	6.392	61.846	55.518	323.566	307.198	0.711697	1.02833	0.605498	0.47239	0.32952	0.30759	0.649386	0.435584	0.68683
6.084	5.758	54.836	58.392	312.46	320.154	1.24557	0.738667	0.723544	0.650818	0.805711	0.294439	0.281061	0.513732	0.725101
4.656	4.402	51.682	51.526	304.914	296.32	0.895134	0.941763	0.673275	0.597845	0.421324	0.386329	0.0927066	0.490362	0.791822
6.51	5.476	53.896	54.78	311.312	307.112	1.0343	0.957007	0.65666	0.530656	0.673223	0.4503	0.50142	0.370698	0.653173
5.796	5.746	56.924	53.374	310.686	307.04	1.02518	0.92564	0.553461	0.435267	0.404935	0.382982	0.68466	0.449568	0.529316
5.412	5.502	54.43	54.418	299.528	320.056	0.902495	1.162	0.731339	0.823916	0.551167	0.78917	0.0518613	0.489214	0.987671
5.6	5.392	59.25	62.038	329.342	337.918	1.26753	0.810364	0.660053	0.712549	0.699011	0.416671	0.372818	0.531892	0.758669
5.798	5.106	55.572	52.05	305.526	299.942	1.22748	0.692516	0.559844	0.458782	0.483562	0.512838	0.928044	0.444607	0.571797
5.344	4.424	50.598	53.982	298.962	308.278	1.09348	0.806269	0.461695	0.512176	0.391013	0.205445	0.570307	0.278865	0.550892
5.708	5.898	57.458	54.83	307.042	305.792	1.40934	1.29235	0.733356	0.748739	0.876851	0.840051	0.649858	0.570933	0.89368
4.528	5.67	52.17	55.738	299.746	306.33	1.17911	1.17863	0.538057	0.604199	0.530166	0.438223	0.706344	0.387199	0.650887
4.802	5.69	50.734	52.574	308.132	300.616	1.22008	1.34508	0.646948	0.527695	0.647898	0.338133	0.321416	0.623689	0.629234
6.052	5.34	56.082	52.086	294.632	284.944	1.0386	0.8101	0.602668	0.491137	0.4422	0.431326	1.40496	0.384421	0.636542
5.232	5.258	51.938	53.926	305.188	303.774	0.868413	0.864441	0.55373	0.658534	0.581432	0.393482	0.0995141	0.452529	0.617904
5.996	4.974	55.016	51.498	322.284	305.684	1.06222	0.628034	0.62459	0.482258	0.650358	0.201523	0.0692066	0.387222	0.763005
5.284	4.956	53.512	52.484	291.412	287.922	1.32144	0.693405	0.773961	0.473836	0.782257	0.363017	0.216127	0.514766	0.735377
5.638	5.662	53.71	52.966	292.424	300.076	0.962065	0.899273	0.551976	0.609778	0.390537	0.42169	0.427127	0.356267	0.617732
5.838	5.578	57.788	58.72	315.086	306.082	1.19036	0.702031	0.694526	0.588674	0.72477	0.330369	0.557356	0.566441	0.635278
5.046	5.756	56.012	57.314	324.932	318.25	0.811105	1.07301	0.622807	0.610922	0.381599	0.525555	0.158391	0.432214	0.703782
4.684	4.904	50.914	53.426	287.126	288.808	1.01348	1.39855	0.650501	0.716922	0.55542	0.740251	0.41221	0.468081	0.736288
4.758	5.056	50.284	53.628	301.222	313.742	0.962232	1.15354	0.605914	0.761857	0.51811	0.513389	0.687159	0.5123	0.737774
5.208	5.862	54.42	54.372	300.96	300.08	0.903653	0.969252	0.559047	0.529383	0.509117	0.459939	0.117391	0.475248	0.634653
4.542	4.984	52.312	51.898	302.87	288.534	0.919971	1.04697	0.583369	0.618865	0.579373	0.479145	1.02021	0.509069	0.664254
5.454	5.562	54.504	56.872	309.76	319.244	0.670594	0.804084	0.582252	0.660716	0.255687	0.346554	0.204821	0.444582	0.682942
5.316	5.612	50.786	54.612	283.97	297.83	1.17437	0.85992	0.508031	0.536765	0.458486	0.322512	0.429124	0.38819	0.563332
4.752	6.79	59.142	57.868	306.986	296.892	0.81211	1.61211	0.758789	0.567348	0.416073	0.544401	0.498669	0.566224	0.803828
4.946	5.132	53.048	53.568	299.902	298.73	0.94092	0.902572	0.683663	0.750221	0.347185	0.400365	0.636865	0.532909	0.882436
5.478	5.562	56.886	54.886	314.246	298.064	1.07523	0.776873	0.609504	0.497607	0.633586	0.387899	0.254323	0.387504	0.54524
6.132	5.526	59.164	57.272	318.232	313.628	0.942995	0.938495	0.660803	0.612443	0.409303	0.5949	0.647371	0.530601	0.759456
5.432	6.006	53.756	56.426	314.106	310.094	0.931071	1.05635	0.672973	0.684771	0.741273	0.339961	0.687588	0.441107	1.57048
5.734	4.674	54.85	51.358	306.77	303.542	1.21953	0.836562	0.620201	0.476321	0.676079	0.388847	0.531245	0.298698	0.680557
5.084	5.452	52.942	50.222	291.664	282.058	0.647895	1.0214	0.582944	0.518208	0.363875	0.621287	-0.00925324	0.463481	0.658134
5.47	5.052	56.194	50.734	301.064	290.428	1.19236	0.650338	0.771049	0.516622	0.549427	0.408568	0.00027412	0.371096	0.776048
5.096	4.85	54.758	49.358	307.826	299.698	0.866991	0.697679	0.607676	0.451486	0.445285	0.356443	0.503297	0.390329	0.623279
5.336	6.138	55.264	54.62	319.398	319.86	0.845519	0.840514	0.55663	0.538235	0.351323	0.433052	0.580956	0.458343	0.680034
5.622	5.554	52.198	54.82	309.366	313.134	0.855276	0.64117	0.630649	0.56889	0.472701	0.126083	0.407078	0.427304	0.81515
4.7	5.486	53.36	53.29	307.53	300.978	1.14534	1.27312	0.673304	0.644797	0.740781	0.546423	0.643455	0.489413	0.724674
5.058	5.528	54.816	59.216	319.032	331.11	1.0326	1.44008	0.563693	0.634695	0.439654	0.590716	0.668754	0.408228	0.666348
5.038	5.616	51.6	52.612	297.438	290.036	0.698738	1.07103	0.498807	0.578403	0.174838	0.403664	0.0163826	0.404386	0.620587
4.75	5.102	54.436	49.548	295.092	287.64	1.10267	1.02623	0.644796	0.510326	0.449325	0.463469	0.295522	0.482503	0.662674
5.616	6.456	56.364	58.062	319.772	309.096	0.928671	1.01681	0.671999	0.619124	0.561925	0.556634	0.554303	0.445336	0.69992
5.074	5.592	57.646	55.714	322.976	318.334	0.955519	0.938812	0.686077	0.605095	0.564159	0.575903	0.0532609	0.550362	0.793452
4.94	5.006	51.138	50.522	297.734	298.296	1.05768	0.871886	0.705661	0.680035	0.491048	0.292357	0.0179237	0.578419	0.75674
5.736	6.14	53.088	55.146	316.224	306.02	0.789136	0.885325	0.529195	0.549544	0.424719	0.335541	0.100515	0.469947	0.611428
4.828	5.422	53.334	54.848	286.61	296.026	1.15915	1.24145	0.71018	0.676611	0.69701	0.512035	0.228156	0.423955	0.84695
5.174	5.442	55.314	52.798	327.848	313.496	0.979802	0.754505	0.806163	0.493055	0.47541	0.52796	0.925642	0.535213	0.71155
4.792	6.354	59.06	55.566	330.34	310.56	0.755358	1.5018	0.712136	0.590786	0.451893	0.707259	0.485319	0.505818	0.732194
5.226	4.99	50.674	48.504	287.722	283.54	1.08134	1.10324	0.630628	0.636425	0.539496	0.363641	0.509585	0.521856	0.755329
5.818	5.296	51.98	52.53	299.098	300.094	1.05129	1.20037	0.822079	0.791327	0.383174	0.682869	0.929412	0.669909	0.888681
5.606	5.14	50.838	52.238	294.594	296.732	0.920311	0.743664	0.466744	0.556405	0.334612	0.421799	0.18003	0.32486	0.640195
6.112	5.138	56.018	53.314	303.698	309.706	1.15237	0.789888	0.6225	0.587004	0.555211	0.39483	0.956922	0.553308	0.658845
5.432	5.678	53.744	58.228	306.014	323.458	0.945355	0.914557	0.516454	0.721783	0.327003	0.323621	0.873036	0.459732	0.67337
5.146	6.068	50.454	53.204	298.176	289.704	0.847523	1.61959	0.630485	0.74803	0.320034	0.563604	0.538068	0.673544	1.0028
5.384	5.412	57.952	57.404	314.482	333.086	0.78022	0.909657	0.561618	0.853768	0.467967	0.486807	0.284244	0.466423	0.808188
6.198	5.072	53.59	52.622	315.282	313.816	1.25715	0.896318	0.599835	0.625168	0.530531	0.636648	0.404985	0.516945	0.7759
4.998	5.642	58.462	55.742	340.396	323.162	0.895655	1.17129	0.760244	0.691186	0.517544	0.933518	0.302508	0.630108	1.01651
6.052	4.93	59.336	54.046	319.354	310.476	0.857871	1.0189	0.701969	0.515113	0.407733	0.666409	0.481573	0.475437	0.673274
5.768	6.064	59.682	54.104	320.832	303.028	1.00073	1.09343	0.643242	0.523602	0.469283	0.778139	0.641153	0.548408	0.772294
4.682	4.614	50.048	55.904	298.93	297.954	0.919366	0.990759	0.606765	0.723976	0.685959	0.49639	1.39833	0.467708	0.764795
5.17	4.12	56.654	51.22	313.842	303.802	1.00518	0.647594	0.775103	0.56407	0.581857	0.421252	0.0417541	0.574856	0.840895
5.04	5.342	55.676	53.8	309.128	307.272	1.01297	0.794828	0.514155	0.625047	0.333892	0.52521	0.591307	0.489402	0.708771
5.922	5.902	51.354	55.872	304.356	318.64	1.06342	0.761515	0.632038	0.647386	0.610757	0.41171	0.309456	0.43229	0.814686
4.714	5.08	47.034	52.812	275.34	297.068	0.916217	1.35585	0.522849	0.711988	0.405809	0.413609	0.479299	0.514683	0.684829
6.14	5.624	54.24	52.694	311.35	310.946	1.33681	0.808987	0.660532	0.596268	0.636622	0.456215	0.522387	0.417942	0.815656
6.198	6.27	57.606	59.7	329.358	331.038	1.07509	1.33316	0.608202	0.740168	0.763063	0.616659	0.928186	0.533566	0.751072
5.498	5.328	54.092	57.912	318.882	322.36	1.126	1.3746	0.677969	0.785701	0.670569	0.613156	0.667926	0.499282	0.816542
5.23	5.728	51.82	53.054	308.482	300.334	1.07049	1.29726	0.566702	0.542028	0.337845	0.568509	0.182375	0.429033	0.69291
7.208	4.856	56.042	53.944	298.214	302.272	1.01931	0.556155	0.658593	0.563494	0.458725	0.520702	0.510246	0.521015	0.727497
5.33	5.72	56.422	56.548	310.588	310.422	1.16538	1.05693	0.551799	0.566387	0.395078	0.32571	0.184917	0.379155	0.714293
5.386	5.602	52.042	52.13	300.762	300.216	0.958083	0.941481	0.628672	0.562503	0.671507	0.52877	0.0222379	0.395589	0.68158
6.078	5.186	54.31	51.688	299.218	299.264	1.1129	0.915759	0.654828	0.575898	0.56449	0.432524	0.150346	0.562694	0.642806
5.826	5.954	54.852	57.948	321.382	331.472	0.926114	1.28944	0.6164	0.680722	0.57692	0.698001	0.495051	0.524311	0.707445
5.666	4.996	55.018	53.136	306.956	307.94	0.734541	0.700291	0.582997	0.557978	0.264472	0.292375	0.696926	0.410067	0.615527
6.332	6.576	58.064	59.002	320.656	316.944	1.03826	1.26771	0.852497	0.830696	0.676467	0.928842	0.613745	0.534204	1.20833
5.422	6.154	56.96	57.574	302.26	308.476	1.01947	1.09889	0.473659	0.536803	0.42932	0.351014	0.645611	0.369842	0.534213
4.962	4.84	55.462	52.376	290.338	291.534	1.02634	1.06123	0.646273	0.552522	0.518859	0.417667	0.6537	0.453133	0.708636
6.12	5.118	56.204	57.568	315.96	319.75	1.50157	0.910092	0.683204	0.666154	0.723643	0.360018	0.31977	0.529627	0.710246
5.38988	5.40796	54.5888	54.448	308.307	306.785	0.998709	0.97592	0.62488	0.606692	0.50913	0.471745	0.455643	0.469436	0.737952
0.534004	0.53079	2.82634	2.67956	12.7951	12.4112	0.191475	0.238339	0.0946625	0.094396	0.160731	0.151381	0.299554	0.0888558	0.149245

## Sheet: Row 6 
Lambda: 10	Mu: 10	Kn: 100	Km: 10	Kp: 6	deltap: 0.3
N1	N2	M1	M2	P1	P2	NM1	NM2	MP1	MP2	NP1	NP2	NN	MM	PP
5.012	4.754	47.402	49.04	267.868	270.192	0.361653	0.303006	0.28766	0.313244	0.302717	0.218459	0.339998	0.284026	0.521525
5.204	4.524	49.686	48.676	274.96	280.648	0.350616	0.254873	0.296957	0.310379	0.283038	0.214707	0.243665	0.28847	0.546968
4.776	4.968	50.98	53.154	290.596	294.982	0.322212	0.38631	0.308926	0.329615	0.232381	0.277157	0.2459	0.275586	0.53529
4.766	4.864	50.164	49.662	282.004	284.534	0.304968	0.333952	0.315485	0.321593	0.298707	0.308354	0.227018	0.264074	0.557706
5.066	5.09	51.782	52.756	281.82	283.418	0.298585	0.336245	0.276383	0.289836	0.311474	0.283938	0.244889	0.251786	0.448614
5.174	5.132	50.654	51.756	297.81	298.242	0.311998	0.304964	0.274551	0.271127	0.254215	0.242145	0.236493	0.259908	0.46327
4.948	4.88	49.77	49.85	292.848	289.772	0.307117	0.321871	0.294797	0.307932	0.280282	0.336015	0.248642	0.279873	0.528238
4.79	5.07	51.962	51.006	303.322	298.546	0.335386	0.37317	0.319321	0.304216	0.300506	0.348325	0.311787	0.287006	0.633392
4.98	5.112	50.958	50.506	286.974	287.898	0.29486	0.358407	0.282411	0.274405	0.200894	0.320049	0.198302	0.245458	0.510383
4.886	4.948	50.508	50.158	275.266	274.04	0.350126	0.35465	0.287938	0.292087	0.264286	0.305102	0.219503	0.279127	0.488856
5.246	5.038	50.424	49.544	279.992	281.66	0.28683	0.33139	0.273607	0.286346	0.216821	0.290912	0.258816	0.272338	0.494873
5.426	4.912	49.568	48.666	268.966	271.766	0.291061	0.283776	0.30498	0.283968	0.258246	0.276827	0.275929	0.265309	0.523254
5.034	4.964	50.288	48.946	276.696	275.224	0.354445	0.28767	0.288864	0.268467	0.33397	0.203168	0.252026	0.272392	0.42826
4.712	4.974	49.316	48.452	271.962	271.714	0.351189	0.370148	0.349273	0.320585	0.298605	0.321379	0.261665	0.303707	0.574104
4.886	5.062	52.922	51.282	299.996	296.48	0.357766	0.386277	0.323147	0.330211	0.287785	0.366101	0.339866	0.30679	0.620629
4.802	5.164	50.304	50.652	275.694	277.05	0.319858	0.284926	0.288962	0.272765	0.293651	0.292072	0.272284	0.244361	0.500435
4.682	4.978	49.35	49.836	281.966	282.222	0.298677	0.291127	0.284713	0.24701	0.248698	0.197762	0.246557	0.251713	0.4258
5.092	5.098	51.052	50.536	288.238	287.07	0.33271	0.327029	0.30769	0.28859	0.322148	0.283694	0.285288	0.286632	0.525576
4.976	4.902	50.21	49.738	273.936	273.132	0.357853	0.301744	0.29777	0.280952	0.291118	0.253857	0.275952	0.297953	0.441118
4.834	4.994	50.744	50.15	296.742	297.95	0.334998	0.306091	0.276491	0.263083	0.225113	0.207653	0.23696	0.261731	0.430076
5.33	4.884	51.32	50.924	289.67	288.5	0.30463	0.290339	0.288782	0.300732	0.215727	0.264204	0.227112	0.275467	0.517797
4.944	5.084	49.144	49.674	284.506	284.242	0.301581	0.359414	0.273867	0.313483	0.240673	0.274233	0.277006	0.281022	0.411942
4.78	4.908	49.308	49.17	292.146	288.786	0.365154	0.34501	0.322409	0.30489	0.329584	0.309106	0.325018	0.293957	0.544211
4.968	5.144	49.424	50.28	290.282	292.35	0.318092	0.320892	0.313279	0.355064	0.303846	0.296964	0.221712	0.269969	0.664206
4.954	5.006	49.222	48.326	276.636	274.884	0.35814	0.287971	0.315265	0.295134	0.326316	0.247415	0.279525	0.280482	0.540757
4.816	5.164	48.094	49.352	279.664	275.598	0.373266	0.376429	0.309612	0.273874	0.282088	0.250043	0.299603	0.274493	0.48046
4.764	5.162	49.178	48.784	275.544	274.938	0.319816	0.334696	0.267244	0.287444	0.262057	0.293405	0.21482	0.256077	0.453548
4.61	5.16	48.194	49.118	268.074	264.354	0.309528	0.39628	0.269729	0.277002	0.247013	0.263656	0.26278	0.271448	0.490731
4.862	5.104	49.966	50.494	275.55	274.06	0.356015	0.357736	0.301023	0.315032	0.272851	0.260586	0.313347	0.299766	0.517128
4.794	5.158	48.644	49.73	275.4	277.692	0.370926	0.404449	0.306973	0.299378	0.270341	0.29633	0.327115	0.296021	0.51078
5.416	5.054	52.028	52.63	304.404	307.39	0.282428	0.288379	0.27671	0.271699	0.260976	0.265348	0.28888	0.229773	0.502977
4.838	4.606	48.078	47.262	267.794	266.188	0.358982	0.283658	0.341565	0.337397	0.348079	0.277759	0.273758	0.286899	0.588422
5.014	4.992	49.892	50.298	281.064	278.986	0.314116	0.356857	0.322562	0.304885	0.257699	0.334891	0.30385	0.273922	0.52245
5.328	5.516	52.068	51.13	294.84	292.312	0.277255	0.31025	0.238219	0.26924	0.282645	0.273955	0.278848	0.238894	0.494033
4.728	4.782	49.346	49	274.634	271.076	0.274874	0.265297	0.228823	0.203525	0.209146	0.176033	0.186877	0.217046	0.401995
5.318	4.912	51.716	50.93	295.408	295.608	0.335594	0.265218	0.292211	0.276355	0.314239	0.251647	0.30426	0.25609	0.487768
4.902	4.968	48.474	48.372	280.936	278.7	0.353491	0.362462	0.305763	0.30975	0.308459	0.318381	0.324009	0.290286	0.489324
5.04	4.904	53.222	51.954	314.684	313.702	0.340972	0.282984	0.293644	0.251213	0.289866	0.212568	0.366155	0.263007	0.580944
4.958	4.804	50.674	51.286	287.086	289.976	0.320111	0.322415	0.278742	0.289933	0.270964	0.300446	0.312982	0.275272	0.433857
5.136	5.226	51.576	51.55	280.84	282.204	0.298889	0.303928	0.24522	0.256643	0.224526	0.237178	0.209477	0.260291	0.416699
5.056	5.018	49.778	49.676	282.13	279.25	0.343126	0.33161	0.314065	0.278873	0.303488	0.262632	0.305012	0.263095	0.524679
4.998	5.028	48.428	48.8	272.356	271.32	0.306272	0.309198	0.269633	0.281101	0.251689	0.242163	0.318746	0.266053	0.465162
4.996	4.99	51.25	49.94	286.99	283.338	0.285587	0.248052	0.289661	0.279733	0.243941	0.276514	0.201524	0.253069	0.529981
5.206	5.038	52.438	53.112	292.74	293.9	0.379223	0.358874	0.324951	0.333182	0.307932	0.332428	0.302428	0.295108	0.565075
5.152	4.782	51.156	49.332	299.692	295.846	0.29273	0.270885	0.313797	0.279846	0.248469	0.275373	0.22699	0.24256	0.625732
4.932	4.782	50.434	49.374	276.244	276.212	0.311757	0.290077	0.293112	0.281298	0.302855	0.258195	0.303988	0.259315	0.479165
4.58	4.762	48.704	48.634	281.212	279.732	0.333089	0.33915	0.312996	0.298286	0.307566	0.29855	0.344938	0.271597	0.556973
5.024	5.324	48.37	49.682	274.266	271.912	0.306266	0.351935	0.299719	0.316992	0.258481	0.277146	0.274974	0.29219	0.523841
5.238	5.016	49.986	49.568	291.956	292.416	0.28813	0.294841	0.279375	0.284441	0.271543	0.284542	0.215634	0.241771	0.706957
5.038	5.018	51.04	51.152	291.436	293.662	0.320399	0.317674	0.346541	0.339429	0.333789	0.32708	0.256095	0.292305	0.618704
5.016	5.066	50.692	51.106	274.786	278.038	0.316867	0.325095	0.293129	0.320465	0.2606	0.260425	0.280397	0.269813	0.539457
5.248	5.098	50.47	49.908	293.208	291.952	0.308097	0.287077	0.298293	0.29159	0.263131	0.238896	0.20605	0.270633	0.51378
4.886	5.246	50.912	49.656	287.25	280.058	0.338864	0.350871	0.274047	0.250518	0.233481	0.27308	0.258791	0.270194	0.460196
5.144	5.428	48.34	50.044	271.326	269.796	0.356334	0.354859	0.298127	0.287978	0.289385	0.255969	0.328158	0.276762	0.489373
4.876	4.546	48.15	49.156	284.058	286.824	0.316618	0.340817	0.294048	0.332504	0.27302	0.293477	0.348419	0.269343	0.503088
5.318	4.838	50.874	49.622	295.436	294.956	0.304037	0.290499	0.260507	0.281465	0.243838	0.266522	0.26847	0.262254	0.485081
5.238	5.164	51.76	51.108	294.638	290.962	0.297022	0.275679	0.280755	0.282195	0.222517	0.240639	0.229338	0.245364	0.492493
4.998	4.944	49.846	48.676	281.108	276.412	0.371069	0.307796	0.305376	0.256121	0.306775	0.260389	0.285632	0.270772	0.49637
4.994	5.082	49.314	49.502	277.604	275.306	0.332644	0.320255	0.267132	0.253417	0.254312	0.243801	0.295178	0.276797	0.42291
4.86	4.84	50.466	48.136	281.818	281.462	0.311182	0.316478	0.279379	0.259839	0.255629	0.255387	0.253099	0.256639	0.45472
4.942	4.822	48.872	49.12	271.426	272.138	0.367921	0.341506	0.302795	0.329493	0.336503	0.308935	0.311053	0.283281	0.488257
4.846	5.216	48.45	49.256	277.448	271.752	0.340516	0.376788	0.274453	0.265073	0.287164	0.26712	0.278174	0.270939	0.411884
5.226	4.986	49.728	50.082	281.174	280.992	0.342042	0.343305	0.299319	0.289763	0.33158	0.260829	0.326601	0.278764	0.469941
4.966	4.812	51.132	50.592	284.242	283.1	0.299749	0.306184	0.278811	0.269504	0.263686	0.292951	0.206537	0.251562	0.469782
4.816	5.188	48.654	49.914	270.554	271.876	0.319267	0.338219	0.274881	0.292576	0.273601	0.242012	0.293903	0.246686	0.465768
5.112	5.284	51.656	51.134	271.264	271.07	0.310281	0.298295	0.247471	0.243438	0.265594	0.228761	0.314573	0.233024	0.416412
5.03	4.982	49.596	49.192	272.202	270.874	0.27095	0.369739	0.281297	0.267602	0.208282	0.292208	0.254087	0.264646	0.496845
5.032	4.976	51.794	51.16	305.704	305.842	0.304332	0.293003	0.300554	0.297078	0.271762	0.272615	0.264866	0.269866	0.533362
5.218	5.116	49.058	48.998	268.632	269.376	0.287559	0.268366	0.273537	0.234873	0.213883	0.238945	0.299405	0.228777	0.464317
5.254	5.206	52.44	51.074	290.228	290.434	0.336286	0.289156	0.301766	0.305432	0.306192	0.27142	0.223451	0.26926	0.537141
4.834	4.848	48.136	47.918	272.788	270.288	0.293598	0.294567	0.284221	0.290812	0.267615	0.234355	0.297275	0.249444	0.498204
5.344	5.09	52.496	52.284	297.702	294.786	0.273498	0.307198	0.250186	0.255855	0.203363	0.2202	0.252593	0.239173	0.458288
4.936	4.812	50.03	49.274	280.66	278.802	0.289619	0.320512	0.268134	0.286287	0.219778	0.272544	0.307029	0.262084	0.500406
5.164	4.698	51.424	51.02	297.62	298.074	0.34229	0.289878	0.303377	0.28097	0.276236	0.252595	0.271334	0.274993	0.510065
5.1	4.744	50.056	49.04	285.378	286.086	0.32121	0.257475	0.2797	0.263332	0.3003	0.278324	0.282515	0.244307	0.500686
4.83	4.876	48.214	48.514	266.97	264.916	0.346548	0.311185	0.275113	0.308613	0.302808	0.249034	0.308498	0.278659	0.585186
4.952	4.46	49.65	48.434	275.076	276.898	0.295781	0.235152	0.260097	0.260896	0.223387	0.188333	0.196721	0.228128	0.52141
5.28	5.01	51.396	50.138	279.978	280.552	0.355735	0.348511	0.300004	0.320912	0.293601	0.28833	0.311789	0.299468	0.524521
4.994	4.586	49.29	48.542	280.904	278.468	0.296854	0.279174	0.280585	0.26693	0.265666	0.228962	0.273334	0.233619	0.516246
5.338	5.308	50.308	50.748	285.78	287.364	0.29988	0.320565	0.287254	0.303828	0.251333	0.265699	0.30554	0.279925	0.486862
4.762	5.206	50.676	50.474	278.046	280.94	0.327653	0.343479	0.260584	0.282178	0.225957	0.281498	0.23673	0.250591	0.472468
4.966	5.154	50.372	50.022	291.516	292.356	0.329235	0.354134	0.294738	0.285022	0.278531	0.292136	0.341739	0.282778	0.509701
4.918	5.002	49.042	49.542	284.65	287.98	0.324401	0.320403	0.289418	0.262269	0.256229	0.237298	0.232832	0.272306	0.495431
4.958	4.868	49.054	49.804	282.66	280.222	0.297649	0.306621	0.258186	0.267546	0.201841	0.260978	0.191489	0.257827	0.466069
5.05	4.826	49.622	48.49	281.802	276.796	0.307109	0.307734	0.337968	0.330042	0.287132	0.299879	0.183233	0.288122	0.513936
4.818	4.97	46.864	48.474	270.046	270.06	0.34402	0.352474	0.310763	0.319706	0.2942	0.287232	0.269088	0.287829	0.494676
4.76	4.796	49.346	49.54	275.628	276.398	0.323624	0.329123	0.274547	0.273419	0.259853	0.213349	0.229775	0.280119	0.462752
5.068	5.044	51.584	52.372	284.664	284.874	0.374053	0.336558	0.316697	0.29104	0.32983	0.305402	0.26768	0.287073	0.524917
5.082	5.266	50.724	51.404	280.938	280.134	0.297207	0.333178	0.253174	0.27453	0.252297	0.274541	0.288906	0.230288	0.485353
5.27	5.154	50.894	52.494	295.276	295.802	0.255663	0.343155	0.239068	0.263847	0.243998	0.303606	0.272194	0.243069	0.44166
5.324	5.078	48.824	49.548	278.102	279.932	0.335662	0.377371	0.313054	0.321317	0.31327	0.301763	0.267769	0.300521	0.544019
4.918	4.828	49.614	48.958	282.964	286.512	0.29187	0.27244	0.288542	0.306959	0.256131	0.279289	0.232012	0.264224	0.450203
5.114	4.836	50.76	50.038	277.268	275.172	0.311137	0.256228	0.256778	0.27435	0.21346	0.218835	0.273347	0.253092	0.44497
4.634	4.73	46.222	47.168	267.3	267.182	0.346219	0.319293	0.289082	0.302591	0.270863	0.24397	0.244808	0.277207	0.506244
5.4	4.876	51.052	49.194	286.64	291.372	0.323052	0.303559	0.26313	0.263917	0.253276	0.295504	0.269643	0.255591	0.479331
5.086	5.046	51.892	51.044	287.78	286.36	0.30364	0.338898	0.286008	0.296231	0.256971	0.290903	0.305476	0.269635	0.496868
5.07	5.032	48.996	49.226	285.594	286.938	0.298904	0.36234	0.310724	0.320148	0.276375	0.31065	0.240278	0.27012	0.521645
4.932	5.182	50.64	50.372	283.796	282.72	0.310176	0.329846	0.281705	0.262331	0.292716	0.255514	0.237915	0.245939	0.466928
4.67	4.64	48.036	47.26	274.982	273.366	0.287422	0.392629	0.272187	0.276515	0.23648	0.327064	0.242917	0.283434	0.440473
5.206	5.456	53.036	53.444	291.598	292.596	0.300118	0.325801	0.271342	0.266974	0.225825	0.248512	0.299645	0.248637	0.477621
5.0081	4.98986	50.0965	49.9612	283.041	282.628	0.320588	0.320881	0.289175	0.288126	0.270418	0.270571	0.270293	0.267491	0.50253
0.196153	0.196812	1.38731	1.30853	9.80522	9.98316	0.0274753	0.0362599	0.0233493	0.0260626	0.035133	0.0358062	0.0409628	0.0193357	0.0547541
